1           **A live yeast supplementation to gestating ewes improves bioactive molecules**  
2           **composition in colostrum with no impact on its bacterial composition and beneficially**  
3           **affects immune status of the offspring**

4 Lysiane Dunière <sup>1,2,\*</sup>, Justin B Renaud <sup>3</sup>, Michael A Steele <sup>4</sup>, Caroline S Achard <sup>1,5</sup>, Evelyne Forano <sup>2</sup>,  
5 Frédérique Chaucheyras-Durand <sup>1,2</sup>

6  
7 <sup>1</sup> Lallemand SAS, 19 rue des Briquetiers, BP 59, 31702 Blagnac cedex, France

8 <sup>2</sup> Université Clermont Auvergne, INRAE, UMR 454 MEDIS, 63122 Saint-Genès Champanelle,  
9 France

10 <sup>3</sup> London Research and Development Center, Agriculture and Agri-Food Canada, London, ON N5 V  
11 4T3, Canada.

12 <sup>4</sup> Department of Animal Biosciences, University of Guelph, Ontario N1G 2W1, Canada.

13 <sup>5</sup> GenPhySE, Université de Toulouse, INRAE, INPT, ENVT, F-31320 Castanet Tolosan, France.

14 \* Correspondence: [lduniere@lallemand.com](mailto:lduniere@lallemand.com)

15  
16 **Abstract**

17 Colostrum quality is of paramount importance in the management of optimal ruminant growth and  
18 infectious disease prevention in early life. Live yeast supplementation effect during the last month of  
19 gestation was evaluated on ewes' colostrum composition. Two groups of ewes (n=14) carrying twin  
20 lambs were constituted and twins were separated into groups (mothered or artificially-fed) 12h after  
21 birth. Nutrient, oligosaccharides (OS), IgG and lactoferrin concentrations were measured over 72h after  
22 lambing, and bacterial community was described in colostrum collected at parturition (T0). Immune  
23 passive transfer was evaluated through IgG measurement in lamb serum. In both groups, colostral  
24 nutrient, OS concentrations and IgG concentrations in colostrum and lamb serum decreased over time,  
25 (p < 0.01) except for lactose, which slightly increased (p < 0.001) and lactoferrin which remained stable.  
26 Bacterial population was stable over time with high relative abundances of Aerococcaceae,  
27 Corynebacteriaceae, Moraxellaceae and Staphylococcaceae in T0-colostrum. No effect of  
28 supplementation was observed in nutrient and lactoferrin concentrations. In supplemented ewes,  
29 colostral IgG level was higher at T0 and a higher level of serum IgG was observed in lambs born from  
30 supplemented mothers and artificially-fed, while no effect of supplementation was observed in the  
31 mothered lambs groups. Using a metabolomic approach, we showed that supplementation affected OS  
32 composition with significantly higher levels of colostral Neu-5Gc compounds up to 5h after birth. No  
33 effect of supplementation was observed on bacterial composition. Our data suggest that live yeast  
34 supplementation offsets the negative impact of early separation and incomplete colostrum feeding in  
35 neonate lambs.

36 **Keywords:** gestating ewes, live yeast probiotic, colostrum, immunity, oligosaccharides

37 **Graphical abstract**

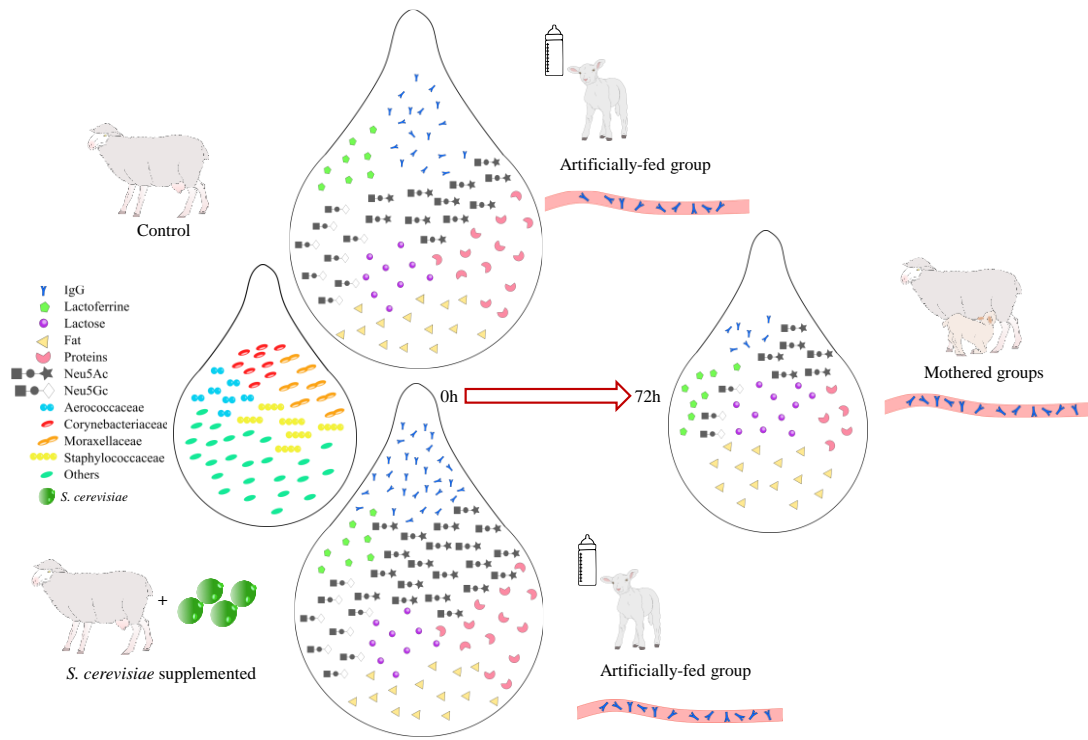

38

39

40

## 41 **Introduction**

42 In ruminant industries (dairy and meat production), major economic losses occur due to diseases in the  
43 first 3 weeks of age <sup>1</sup>. At birth, ruminants are hypoglycemic and agammaglobulinemic, and adequate  
44 colostrum intake is crucial for survival and control of infectious diseases in the newborn <sup>2</sup>. Colostrum  
45 is the first source of nutrition in neonate ruminants, providing essential components, such as energy and  
46 nutrients, but also hormones and growth factors. The high levels of fat and proteins observed in  
47 colostrum lead to better glucose regulation in colostrum-fed ruminants (vs formula-fed animals) and  
48 improve their growth in early life <sup>3</sup>. Furthermore, colostrum ingestion is of paramount importance for  
49 the neonate as it promotes Immunoglobulin (Ig) transfer from the dam to the newborn (known as  
50 Immune Passive Transfer, IPT) and provides protection against infections <sup>4</sup>. Inadequate absorption of  
51 colostrum Igs through the gut is known as failure of passive transfer (FPT) and is characterized by a  
52 serum IgG level lower than 10 g/L <sup>5</sup>. FPT in neonatal lambs has been shown to increase neonatal  
53 mortality, with associated economical losses <sup>6-8</sup>. Besides Igs, colostrum contains many other molecules  
54 involved in immunity such as lactoferrin, mucin,  $\alpha$ -lactalbumin or serum amyloid A <sup>4</sup>. Colostrum also  
55 contains leucocytes in variable concentrations <sup>9,10</sup> and high levels of oligosaccharides (OS) compared  
56 to milk. OS are considered prebiotics, i.e. highly branched sugars not digested directly by the host but  
57 by its gut microbiota. Due to its composition, colostrum ingestion immediately after birth may shape  
58 the initial digestive microbial colonization and supports gastrointestinal tract (GIT) maturation. Indeed,  
59 over the 12 first hours of life, a higher abundance of total bacteria was observed in the small intestine  
60 and colon of neonate calves, with an increase in *Bifidobacterium* genus and butyrate producers in the  
61 colon (*Clostridium* cluster XIVa) and a decrease in *E. coli* abundance <sup>11,12</sup>. OS have been shown to  
62 promote *Bifidobacterium* growth <sup>13</sup>. Sialylated OS are able to adhere to the intestinal epithelial cells <sup>14</sup>  
63 and increase mucosa-associated *Bifidobacterium* in the distal jejunum and colon of colostrum fed calves  
64 <sup>12,15</sup>. Moreover, colostrum OS have a role in host-defense by pathogen binding <sup>16</sup>. Colostrum ingestion  
65 also increases GIT development by increasing cell renewal and villus development and enhancing  
66 metabolic changes to accelerate GIT maturation <sup>17</sup>. Elevated levels of growth hormone, insulin, insulin  
67 growth factor and cholesterol in colostrum are involved in somatotrophic axis development in the young  
68 ruminant <sup>18</sup>. The sources of microbial inoculation of the ruminant neonate GIT are still under study <sup>19,20</sup>  
69 but as colostrum is the first source of energy ingested, its microbiota will be one of the first contacts of  
70 foreign elements for the neonate's digestive tract since its birth. Few studies have depicted the microbial  
71 composition of ruminant colostrum, and those that have mainly focused on bovine colostrum, leaving  
72 information lacking in ovines.

73 In sheep production, artificial rearing is a common practice for prolific breeds in which supernumerary  
74 lambs are separated from their mother at very early age (0-2 days after birth) and fed milk replacer.  
75 This practice presents several detrimental short and long term effects for the young animals <sup>21</sup> and  
76 strategies are currently being studied in order to reduce the impact of mother separation on the lamb's  
77 immunity, growth and performance and microbial digestive establishment <sup>22,23</sup>. Live yeast based feed

78 additives have been shown to enhance stabilization of rumen microbiota during challenging periods  
79 <sup>24,25</sup>. Peripartum modifications of rumen microbiota composition with an increase in milk production  
80 have been observed in dairy cows supplemented with the same live yeast used in this study <sup>26</sup>. Moreover,  
81 the supplemented animals presented differential expression of genes involved in pro- and anti-  
82 inflammatory processes along the digestive tract around calving, suggesting an improvement in rumen  
83 epithelial barrier associated with supplementation <sup>27</sup>. An increased inflammatory status would be  
84 detrimental for the animal, as part of the metabolizable energy will be directed towards immune  
85 reactions instead of fetus development, maintenance of body condition score and the physiological  
86 changes required for lactation onset. Colostrum quality is impacted by health condition of the gestating  
87 animal <sup>28-30</sup>. Probiotic supplementation peripartum could thus be a nutritional strategy to reinforce  
88 rumen functions through stabilization of microbial populations, leading to an enhancement of the dam's  
89 health before parturition <sup>26,27,31</sup>.

90 In this study, we hypothesized that live yeast *S. cerevisiae* supplementation of ewes during last month  
91 of gestation will improve colostrum nutritional and immune qualities impacting the immune passive  
92 transfer to their lambs afterwards and also modify colostrum microbiota. More precisely, we  
93 investigated differences in colostrum nutrients, lactoferrin and IgG concentrations. Oligosaccharide  
94 compositions were depicted through highly specific LC-MS techniques, and bacterial population was  
95 described through qPCR and 16S rDNA sequencing approaches.

96

## 97 **Material and Methods**

98

### 99 ***1- Diets and animals***

100

101 The animal trial was conducted at the animal facilities of INRAE Herbipôle Experimental Unit UE1414  
102 (Clermont Auvergne Rhône Alpes). Procedures on animals were carried out in accordance with the  
103 guidelines for animal research of the French Ministry of Agriculture and all other applicable national  
104 and European guidelines and regulations for experimentation with animals (see [http://www2.vet-](http://www2.vet-lyon.fr/ens/expa/acc_regl.html)  
105 [lyon.fr/ens/expa/acc\\_regl.html](http://www2.vet-lyon.fr/ens/expa/acc_regl.html) for details). The protocol was approved by the Regional Ethics  
106 Committee for Animal Experimentation C2EA-02 and authorized by the French Research Ministry with  
107 the reference number 14981-2018050417167566V3.

108 Twenty-eight gestating ewes (*Ovis aries*, Romane breed) were used for this study. All of them carried  
109 two fetuses. They were selected following echographic evaluation a few weeks before the start of the  
110 trial and assigned to two groups (**Control = C**, **Supplemented = SC**) which were balanced  
111 homogeneously according to age, parity, body condition score and live weight.

112 One month and a half before estimated date of parturition, ewes were transferred from the farm unit to  
113 a room equipped with Biocontrol CFRI systems ([www.BioControl.no](http://www.BioControl.no)) which allowed to control

114 individual concentrate intake. Ewes were identified by means of ear RFID (radio frequency  
115 identification) transponders for specific access to the manger. As the yeast supplement was  
116 incorporated into the experimental concentrate, it was important to ensure that each animal had the same  
117 quantity of concentrate ingested, and at the same time of the day. Ewes were progressively adapted to  
118 the concentrate during the month before the start of the trial, by increasing the amount of concentrate  
119 fed daily up to 800 g /d/animal. Then, until parturition, each ewe received this fixed amount of  
120 concentrate (Moulin de Massagettes, Massagettes, France, Supplementary Table S1) daily, distributed  
121 once at 8:00 am, followed by 2 kg of meadow hay. Good quality water was offered *ad libitum*.

122 After 2 weeks of adaptation to the BioControl system and to this diet, the two groups received their  
123 allocated experimental concentrate, the only difference being the incorporation of the live yeast product  
124 – *Saccharomyces cerevisiae* CNCM I-1077 (Levucell SC TITAN, Lallemand SAS, Blagnac, France) –  
125 for the SC group. The rate of inclusion in the concentrate was calculated to bring  $8 \times 10^9$  CFU per day  
126 per individual. A few days before their estimated date of parturition, ewes were transferred to a  
127 maternity unit which was split into two large pens separated by a concrete wall, to ensure that no contact  
128 could occur between the groups. Bedding was made of straw. Animals were then kept in these pens  
129 until the end of experiment.

130 After parturition, the concentrate was not supplemented anymore with live yeast product. Thus, live  
131 yeast supplementation to the SC group occurred only during the end of the gestation phase and was  
132 stopped at parturition. The composition of the postpartum diet was modified to meet the requirements  
133 of the dam in order to feed only one lamb (the other one was directed to an artificial milk feeding  
134 system). So, each ewe was fed with 600 g of concentrate and 3 kg of meadow hay, covering slightly  
135 more than 135 % of its energy needs.

136 At birth, twin lambs were kept with their mother in an individual birth pen for about 12h to ensure a  
137 first colostrum uptake. During this period the lambs were weighed and ear tagged. Animal care was  
138 performed if necessary, and lambs were trained to reach the teats. Then one of the twins was separated  
139 from the dam, entered into the Artificially fed-group (**Art-**) and was moved in another pen, whereas the  
140 other twin was kept with the dam (Mothered group, **Mot-**). The lambs were chosen on the basis of their  
141 birth weight and sex to constitute homogeneous groups. Thus, four groups of lambs were constituted,  
142 named Cont-Art, Suppl-Art, Cont-Mot, Suppl-Mot Lambs from the four groups considered in this study  
143 for blood sampling. Artificially fed lambs were fed with milk replacer (Agnodor, Bonilait Protéines,  
144 France). They had been bottle fed for the first few hours/days and as soon as they were comfortable and  
145 autonomous, they were fed with a milk bucket equipped with teats, then an automatic milk replacer  
146 feeder was put in place to offer milk *ad libitum*. The same concentrate given to the ewes was offered  
147 from the second week, along with good quality hay and good quality water, but was very weakly  
148 consumed during the first days. However, as the bedding was made of straw, lambs could also have

149 access to fibre through this bedding area. Weaning occurred when the lambs reached about 14 kg, as it  
150 is usually done at the experimental farm.

151

## 152 **2- Sample collection**

153

### 154 *a- Colostrum sampling from ewes*

155 Samples were taken manually and collected at lambing (T0), 5h, 12h, 24h and 72h after lambing without  
156 oxytocin injection. The samples were collected from the two teats with gloves and with prior cleaning  
157 of the teats with a clean tissue immersed in hot water. A camera was installed in each experimental  
158 room to monitor potential night lambing and further calculate the time when colostrum would be  
159 sampled. Samples were aliquoted in several Eppendorf sterile microtubes and rapidly frozen at -20°C  
160 for further analyses. Due to physiological variations in lambing time and colostrum yield, the quantity  
161 collected varied greatly among animals and time and some ewes couldn't be sampled at each time  
162 points. The final number of colostrum samples was 12 samples at T0h (C = 6, SC = 6), 21 samples at  
163 T5h (C = 10, SC = 11), 24 samples at T12h (C = 11, SC = 13), 24 samples at T24h (C = 13, SC = 11)  
164 and 26 samples at time T72h (C = 13, SC = 13).

165

### 166 *b- Blood sampling from lambs*

167 Blood samples were collected from all lambs at day 2, 7, 28 and 55 of age through the jugular vein in  
168 dry collection tubes (Becton Dickinson, Franklin Lakes, NJ, USA) by a qualified technician. Dry tubes  
169 were set for clotting for at least 1 h at room temperature, centrifuged at 4 500 rpm for 20 min at 4 °C  
170 and serum supernatants were stored at -80 °C until further analysis.

171

## 172 **3- Sample analyses**

173

### 174 *a- Biochemical analyses*

175 Nutrient composition of colostrum was determined from samples diluted 1/10, 1/100 or 1/1000 in PBS  
176 1X as follows: lactose content was measured from 200 µl of diluted samples with Lactose/D-Galactose  
177 (Rapid) Assay Kit (Megazyme, Wicklow, Ireland) according to the manufacturer instructions; protein  
178 content was measured from 100 µl of diluted samples with Pierce™ BCA Protein Assay Kit  
179 (ThermoFisher, Rockford, IL, USA) and lipid content was analyzed by hydrolysis according to an  
180 internal method adapted from NF ISO 6492 by Artemis Laboratory (Janzé, France) from 1 ml of frozen  
181 raw colostrum.

182 Bioactive molecules were analyzed as follows: lactoferrin concentration was measured from 50 µl of  
183 diluted samples through Sheep Lactoferrin (LF) ELISA Kit (Mybiosource, San Diego, CA, USA)  
184 according to the manufacturer recommendation; the Immunoglobulin G (IgG) concentration was  
185 analyzed by radial immunodiffusion by CIAL Sud Ouest laboratory (Auch, France) from 1 ml of raw

186 colostrum and 1 ml of lamb blood sample. For biochemical analyses, no technical replicate was  
187 performed due to volume limitation, but all biological replicates were analyzed (i.e. from 6 to 14 animals  
188 per group).

189

#### 190 *b- High-resolution LC-MS colostrum analysis*

191 All LC-MS data was acquired with a Thermo Q-Exactive Orbitrap<sup>®</sup> mass spectrometer coupled to an  
192 Agilent 1290 HPLC system. Analytes were resolved by hydrophilic liquid interaction chromatography  
193 (HILIC) with a 350  $\mu\text{l min}^{-1}$  flow rate. Two microliters of sample was injected onto a PEEK lined  
194 Agilent HILIC-Z (2.1  $\times$  100 mm, 2.7  $\mu\text{m}$ ; Agilent) column maintained at 35  $^{\circ}\text{C}$ . Compounds were  
195 resolved with mobile phases of 10 mM ammonium formate + 0.1% formic acid in water (A) and 10  
196 mM ammonium formate + 0.1% formic acid in 90% acetonitrile (B) operating with the following  
197 gradient: 0 min, 90% B; 1.0 min, 90% B; 5.0 min, 62% B; 5.5 min, 30% B; 10.5 min, 30% B, 11.0 min  
198 90% B and 15.5 min, 90% B. Sample of 100  $\mu\text{l}$  of each raw colostrum sample was diluted with 400  $\mu\text{l}$   
199 of ddH<sub>2</sub>O. These samples were extracted using the method developed by Fischer et al. <sup>15</sup>. A 5  $\mu\text{l}$  spike  
200 of the internal standard (IS:  $\beta$ 1–3-gal-N-acetyl-galactosaminy1- $\beta$ 1–4-gal  $\beta$ 1–4-Glc; GalNAc, 1000  
201  $\mu\text{g/ml}$ ) was added to the diluted colostrum sample, for a final IS concentration of 9.9  $\mu\text{g/ml}$ . Finally, a  
202 100  $\mu\text{l}$  aliquot was diluted with 100  $\mu\text{l}$  acetonitrile (0.2% FA, 20 mM ammonium formate) and placed  
203 in a 250  $\mu\text{l}$  polypropylene HPLC vial prior to LC-MS analysis. The following conditions were used for  
204 heated electrospray ionization (HESI): capillary voltage 5 kV; capillary temperature, 330  $^{\circ}\text{C}$ ; sheath  
205 gas, 32 arbitrary units; auxiliary gas, 10 units; probe heater temperature, 280  $^{\circ}\text{C}$  and S-Lens RF level,  
206 50%.

207

#### 208 • *Non-targeted chemical analysis*

209 Non-targeted analysis was performed on a subset of samples: 12 samples at T0h (C = 6, SC = 6), 21  
210 samples at T5h (C = 10, SC = 11) and 9 samples at T72h (C = 3, SC = 6). Samples were analyzed in  
211 both positive and negative ionization modes, at 140,000 resolution, automatic gain control (AGC) of  
212  $3 \times 10^6$ , maximum injection time (IT) of 512 ms and mass range 150 to 1250 m/z. Ten microliters of all  
213 samples were combined as a pooled QC composite sample that was analyzed at the beginning and end  
214 of the LC-MS analysis to verify minimal instrumental drift. Composite samples were also analyzed by  
215 a top 8 data-dependent acquisition for compound identification consisting of a 35,000 resolution,  $3 \times 10^6$   
216 AGC, 128 ms max IT followed by MS/MS at 17,500 resolution,  $1 \times 10^5$  AGC, 64 ms, 1.2 m/z isolation  
217 window and 25,35 stepped collision energy. Thermo .raw files were converted to .mzml format using  
218 Proteowizard <sup>32</sup> with peak peaking filter applied. Features were detected using the XCMS package <sup>33</sup>  
219 with the centWave method (ppm tolerance 1.0 <sup>34</sup>). The signal to noise threshold was set to 5, noise was  
220 set to  $1 \times 10^6$  and pre-filter was set to six scans with a minimum 5,000 intensity. Retention time correction  
221 was conducted using the obiwrap method <sup>35</sup>. Grouping of features was set to those present in at least

222 25% of all samples (retention time deviation 10 s;  $m/z$  width, 0.015). The ‘fillPeaks’ function with  
223 default settings. Remaining zeros values were imputed with two thirds the minimum value on a per  
224 mass basis. Compounds were identified by accurate mass, comparison of retention times to authentic  
225 standards or by accurate mass and also comparison of fragmentation patterns to MS/MS databases <sup>36</sup>.

226

227 • *Quantification of sialyl oligosaccharides.*

228 Eight analytes (Figure 5 and Supplementary table S2) were quantified within all samples by single  
229 stage, high resolution mass spectrometry based on their accurate mass ( $\pm 3$  ppm). The target analytes  
230 were monitored in negative ionization mode by 2 SIM scans between mass ranges of  $m/z$  625-710 and  
231 915-940. Both SIM scans were performed at a resolution of 17,500 resolution, automatic gain control  
232 (AGC) of  $3 \times 10^6$ , and maximum injection time of 64 ms. The LC method was modified for these target  
233 analytes as follows: Mobile phase B was held at 90% for 1.0 min, before decreasing to 62% over 4 min  
234 followed by a decrease to 30% over 0.5 min. Mobile phase B was held at 30% for 4 min, before  
235 returning to 90 % B over 0.5 min and equilibrated for 2 min. Given their high structural similarity and  
236 retention times, the N-acetylneuramic (Neu5Ac) containing compounds were used as surrogate  
237 standards for the quantification of the corresponding N-glycoylneuraminic (Neu5Gc) containing  
238 analytes. The recovery efficiency ( $R_e\%$ ) for GalHNAc, 3’ASL, 6’ASL, 3’ASLN, 6’ASLN were  
239 calculated by fortifying 100 $\mu$ L composite colostrum samples with each analyte before extraction (pre-  
240 spike) and fortifying a second set after extraction. The signal suppression/enhancement (SSE%) was  
241 calculated by the signal ratio of composite colostrum samples fortified after extraction with a fortified  
242 water sample. For targeted analysis, all collected samples from T0h to T72h were processed and  
243 analyzed in duplicate.

244

245 *c- Colostrum microbiota analysis*

246 DNA was extracted from at least 250 mg of raw colostrum using the Quick DNA Fecal/Soil Microbe  
247 kit (Zymo Research, Irvine, CA, USA). DNA yield and quality were determined after Nanodrop 1000  
248 and Qubit spectrophotometric quantifications. DNA extracts were stored at -20 °C until analysis. An  
249 average of  $20.83 \pm 73.34$  ng/ $\mu$ l of DNA were extracted from raw colostrum samples (dsDNA, Qubit  
250 quantification), except for one sample from SC group whose quality was not sufficient for further  
251 analysis, and which was thus discarded from bacterial analyses.

252 Total bacteria population was quantified using qPCR method, with specific primer set and PCR  
253 conditions targeting ribosomal RNA gene according to Bayat et al., <sup>37</sup>. The absolute abundance of total  
254 bacteria was expressed as the number of gene copies per microgram of colostrum. The standard curves  
255 (from  $10^2$  to  $10^9$  copies of bacterial 16S rDNA) were prepared by serial dilutions according to Mosoni  
256 et al., <sup>38</sup>. Efficiency of the qPCR for each target varied between 97 and 102 % with and a regression  
257 coefficient above 0.95.



258 Microbial diversity and composition of colostrum were studied in T0 samples (ie: 6 ewes per treatment  
259 group), using 16S rDNA amplicon sequencing. The hypervariable V3-V4 regions of the 16S rRNA  
260 gene were targeted for sequencing (466bp; 341F 5'- CCTAYGGGRBGCASCAG-3'; 806R 5'-  
261 GGACTACNNGGGTATCTAAT-3'). High-throughput sequencing was performed on a Illumina  
262 MiSeq sequencer by the GeT-PlaGe core facility (INRAe Transfer, Toulouse, France). MiSeq Reagent  
263 Kit v3 was used according to the manufacturer's instruction (Illumina Inc., San Diego, CA).  
264 Bioinformatics analyses were performed using GenoToul bioinformatics facility (INRAe, Toulouse,  
265 France). Sequences were processed using FROGS 3.2 pipeline on Galaxy platform <sup>39</sup>. Briefly,  
266 sequences were clustered in Operational Taxonomic Units (OTUs) using SWARM algorithm <sup>40</sup>.  
267 Chimeric sequences detected by samples using UCHIME algorithm <sup>41</sup>. A total of 464 858 reads were  
268 merged and processed and 437 504 sequences were kept after chimera removal. Singleton OTUs were  
269 excluded and the remaining 2 311 OTUs were affiliated with SILVA 138.1 database using BLAST  
270 algorithm (97% sequence identity threshold).

271

#### 272 *d- Statistical analysis*

273 The number of animals enrolled in this study was limited by the experimental facility capacity and the  
274 criteria retained for animal inclusion in each experimental group. More precisely, ewes had to be  
275 gestating with two fetuses and each experimental group was balanced by ewe's body score condition,  
276 live weight, age and parity. According to these criteria, 14 ewes were enrolled in each experimental  
277 group. Graphical representations and statistical analyses were performed using GraphPad Prism 9.0.2.  
278 The effect of Supplementation (C or SC) and Time factors and their interaction were evaluated using  
279 mixed model with repeated time and multiple comparisons with Sidak's adjustment. Colostrum qPCR  
280 data were log<sub>10</sub> transformed before statistical analysis. For lamb serum analysis, a linear mixed model  
281 with repetitions was applied considering 3 factors: Time, Supplementation and Rearing mode (Art- or  
282 Mot- groups) and their interactions. Multiple comparisons were made according to Tukey's test. For  
283 colostrum microbial sequencing data, Mann Whitney test was performed on relative abundance of each  
284 considered taxa. Statistical significance was determined at a p-value < 0.05 and trends discussed at p-  
285 value < 0.10. Significant effect of Supplementation factor was indicated in Figures with # p < 0.1, \* p  
286 < 0.05, \*\* p < 0.001 and \*\*\* p < 0.0001.

287

## 288 **Results**

289

### 290 *1- Nutrient composition*

291

292 The nutrient composition of colostrum was studied over the 72h after lambing (Figure 1). Fat (1a),  
293 lactose (1b) and protein (1c) concentrations varied greatly among individuals and no statistical

294 differences were observed between Control (C) and Supplemented (SC) groups, but a strong Time effect  
295 was observed (Table 1). Fat concentration decreased over time while a slight increase of lactose  
296 concentration was observed with time. A drastic decrease of protein concentration was measured from  
297 the first hours after lambing.

298

## 299 **2- Bioactive molecule composition**

300

301 Lactoferrin concentration in colostrum was quite stable over time (Figure 2a, Table 2). Great intra-  
302 individual variations were observed among the animals, especially at early time points. Interestingly, a  
303 numerically higher level of lactoferrin (+15.8 %) was quantified in colostrum of supplemented ewes at  
304 24h ( $3.79 \pm 0.28$   $\mu\text{g/ml}$  and  $4.38 \pm 0.52$   $\mu\text{g/ml}$  in C and SC groups respectively) after lambing.  
305 Immunoglobulin G (IgG) was measured over time in colostrum (Figure 2b). A large variation in IgG  
306 concentrations was observed among animals during the first 12h post-partum. Concentrations decreased  
307 rapidly to reach low levels after 24h (from  $52.89 \pm 31.61$  and  $79.50 \pm 15.24$   $\text{mg/ml}$  at 0 h to  $3.73 \pm 2.48$   
308 and  $4.03 \pm 4.24$   $\text{mg/ml}$  after 72h for C and SC groups, respectively,  $p < 0.001$ ). There was a tendency  
309 for Time x Supplementation interaction and the IgG concentrations in the colostrum of supplemented  
310 ewes were higher than those of control at T0 ( $p = 0.046$ , Sidak's multiple comparison test).

311 IgG concentrations were also measured in the serum of lambs (Figure 3). Strong significant effects of  
312 Time, Supplementation and their interaction were observed, as well as a tendency for the interaction of  
313 the 3 factors considered (Table 3). The serum IgG concentration drastically decreased in all groups  
314 during the first 3 weeks of life from a predicted mean of  $28.71$   $\text{mg/ml}$  at 2d of age to  $7.42$   $\text{mg/ml}$  after  
315 28d and remained stable up to 55d ( $7.01$   $\text{mg/ml}$ ). Among Artificially fed lambs, a significant higher  
316 level of IgG was observed in serum of lambs born from supplemented mothers at day 2 ( $p < 0.001$ ,  
317 Tukey's multiple comparison test). Interestingly, no significant difference of IgG concentration was  
318 observed among artificially fed lambs from supplemented mothers and lambs kept with their mother  
319 whatever the supplementation status.

320

## 321 **3- Metabolomic analysis of colostrum samples**

322

### 323 *a- Non-targeted analysis*

324 Colostrum samples from 0 h, 5 h and 72 h post-partum of both groups were analyzed in positive and  
325 negative ionization mode. In positive mode, the most intense signals corresponded to carnitine, acetyl  
326 carnitines as well as lactose and glycerophosphocholine (Figure 4a). In negative ionization mode  
327 (Figure 4b), the major analytes detected were two isobaric peaks matching the formula of lactose ( $\alpha$ -

328 and  $\beta$ - anomers of lactose). Two other major peaks eluting later in the run are uridine-diphosphate  
329 (UDP) hexose and UDP-acetylglucosamine, the precursors to lactose and *N*-acetylglucosamine  
330 respectively.

331 In positive ionization mode, 583 features were extracted among which 12, 21 and 3 features were  
332 differentially expressed ( $p < 0.01$ ) at 0, 5 and 72 hours post-lambing, respectively (Supplementary table  
333 3). Of all differentially expressed features, only 3, 4 and 1 were decreased in the SC group after 0 h, 5  
334 h and 72 h, respectively. In negative ionization mode, fewer features were extracted at the same defined  
335 noise level. Of the 355 features extracted, only 6, 7 and 4 were differentially expressed ( $p < 0.01$ ) at 0,  
336 5, and 72 hours post-lambing. A significantly altered feature of formula  $C_{25}H_{42}N_2O_{20}$  was detected in  
337 both positive and negative ionization modes. In negative ionization mode, another significantly  
338 increased feature has a putative formula of  $C_{23}H_{39}NO_{19}$ .

339 The identity of these differentially expressed analytes was characterized by MS/MS using spectra of  
340 commercial standards of 6'-acetyl-sialyllactose (6'-ASL) and 6'-acetyl-sialyllactosamine (6'-ASLN,  
341 Supplementary Figure S1). The distinct spectra observed indicated that an additional oxygen atom is  
342 present on the sialyl residue. These compounds were thus identified as *N*-glycolylneuraminic (Neu5Gc)  
343 lactose and Neu5Gc lactosamine. The precursors Neu5Ac OS were also detected in high concentrations  
344 in analyzed samples (Figure 5).

345

#### 346 *b- Targeted analysis of colostrum samples*

347 The sialyl oligosaccharides identified by non-targeted analysis were quantified by high resolution MS  
348 over 72 h post-lambing to determine if supplementation affected their production. A strong and  
349 significant Time effect was observed for total sialylated OS (Total), Neu5Ac, Neu5Gc and any of the  
350 OS structures observed (3'- and 6'-sialyllactose, disialyllactose and 3'- and 6'-sialyllactosamine, Table  
351 4, Figure 6). No effect of Supplementation was observed among the Neu5Ac OS identified while  
352 significant Supplementation effect and interaction with Time was observed for 6'-GSL, 6'-GSLN and  
353 total Neu5Gc. More precisely, a higher concentration of Neu5Gc was observed in SC group in the T0  
354 colostrum ( $p = 0.018$ ). The concentration of 6'-GSL (Figure 7a) was significantly increased as well at  
355 T0 ( $89.91 \pm 39.57$  mg/l and  $147.38 \pm 62.92$  mg/l in C and SC groups, respectively,  $p = 0.042$ ) and also  
356 5 h after lambing ( $85.39 \pm 43.53$  mg/l and  $130.07 \pm 53.94$  mg/l in C and SC groups, respectively,  $p =$   
357  $0.044$ ). Concentration of 6'-GSLN in SC group was about twice that measured in C group at the same  
358 time points ( $119 \pm 40.37$  mg/l and  $248.47 \pm 120.09$  mg/l in C and SC groups, respectively,  $p < 0.001$  at  
359 0 h;  $106.26 \pm 42.59$  mg/l and  $180.22 \pm 70.27$  mg/l in C and SC groups, respectively at 5 h;  $p = 0.009$ ,  
360 Figure 7b). After 12 hours, no differences between the groups were measured.

361 The biosynthetic pathway for both Neu5Ac OS and Neu5Gc OS has been reconstructed from the non-  
362 targeted LC-MS data (Figure 8). A Neu5Ac residue is loaded onto a cytosine-monophosphate molecule  
363 (CMP) which can transfer the Neu5Ac to the 3' or 6' position of lactose or *N*-acetyllactosamine.  
364 Alternatively, CMP-Neu5Ac can be hydroxylated enzymatically to CMP-Neu5Gc. The statistical  
365 analysis of the reconstructed Neu5Gc pathway was performed on colostrum samples collected 5 h post-  
366 partum as the statistical significance was the highest at that sampling time. No significant difference  
367 was observed between C and SC groups for Neu5Ac, lactose, *N*-acetyllactosamine nor the Neu5Ac OS.  
368 CMP-Neu5Ac was also not altered by supplementation. In SC group, the elevated levels of Neu5Gc  
369 containing oligosaccharides (glycolyl-SLN and glycolyl-SL;  $p < 0.01$ ) concomitant with the decreased  
370 levels in CMP-Neu5Gc ( $p = 0.03$ ) suggest an increased activity of sialyltransferase enzymes.

371 The peak area ratios of CMP-Neu5Gc/CMP-Neu5Ac showed that the concentration of CMP-Neu5Gc  
372 was much higher (~20 fold on average, with large individual variations) in both C and SC groups ( $p =$   
373  $0.017$  and  $p = 0.002$  respectively, Supplementary Figure S2), meaning that there is no clear evidence  
374 that only specific enzymatic activity of Neu5Gc sialyl transferases was altered.

375

#### 376 *c- Bacterial population of colostrum samples*

377 Q-PCR analysis showed that total bacterial population was stable over time and no effect of  
378 supplementation was observed, possibly due to very high inter individual variability (Table 5). Overall,  
379 in C group, total bacterial population was on average of  $1.13 \times 10^6$  CFU/g while a slightly higher  
380 concentration was observed in SC group (average of  $1.54 \times 10^6$  CFU/g colostrum).

381 Statistical analysis on alpha diversity indices indicated no effect of supplementation whatever the  
382 indexes considered ( $p > 0.05$ ), possibly because of the low number of samples considered. Indeed,  
383 higher numerical values of richness (i.e. Observed OTUs and Chao1) and evenness (Shannon index)  
384 were observed in C group (Figure 9). One outlier sample from C group (C\_6) presented lower richness  
385 and evenness than the other control samples, while one outlier sample from SC group (SC\_5) presented  
386 a higher richness than the rest of SC samples. Based on the visualization of the beta diversity using  
387 Bray-curtis distance and PCoA projection, no clusterization of bacterial community structure at OTU  
388 level was identified according to experimental groups (Figure S3). The colostrum sample C\_2 from C  
389 group was apart from all the others, both along the first (2.82 %) and the second axes (15.9 %).

390 Bacterial taxonomic composition of T0-colostrum samples at the Phylum and Family levels is presented  
391 in Figure 10. At the Phylum level (Fig 10a), colostrum samples were dominated by 5 major phyla with  
392 Proteobacteria and Firmicutes being the most abundant in C ( $36.30 \pm 26.4$  % and  $33.57 \pm 15.98$  %, respectively)  
393 and in SC samples ( $35.93 \pm 9.61$  % and  $28.81 \pm 9.34$  %, respectively). Actinobacteria was  
394 the third phylum in terms of relative abundance in both groups ( $18.36 \pm 10.81$  % and  $25.29 \pm 8.94$  % in

395 C and SC group, respectively). Numerical differences were observed between groups (C vs SC) with a  
396 higher level of Proteobacteria and a lower level of Actinobacteria in C samples, but these differences  
397 were not statistically significant ( $p > 0.05$ ). The previously identified unique C\_2 sample was  
398 characterized by the highest abundance of Proteobacteria (72.55 %).

399 At the Family level (10b), part of the bacterial diversity was linked to low abundant families ( $< 1$  %,  
400 representing  $14.47 \pm 5.54$  % vs  $16.72 \pm 15.27$  % of the total family reads in C and SC groups,  
401 respectively). Aerococcaceae ( $13.31 \pm 8.29$  % vs  $9.34 \pm 7.21$  %), Corynebacteriaceae ( $11.28 \pm 7.19$  %  
402 vs  $21.7 \pm 9.21$  %), and Moraxellaceae ( $15.23 \pm 21.4$  % vs  $8.3 \pm 8.15$  %) were the dominant families in  
403 C and SC groups respectively. Interestingly, a higher level of Staphylococcaceae was observed in C  
404 samples ( $8.22 \pm 5.73$  %) compared to SC group ( $5.96 \pm 2.58$  %). However, none of these observed  
405 differences reached the significance level.

406

## 407 **Discussion**

### 408 **Colostrum composition dynamics across the first 72h post-partum**

409 Good colostrum management at birth is recognized as an important parameter to ensure the sanitary  
410 status of the neonates, further herd performances and limit economic losses<sup>2</sup>. Variations in colostrum  
411 nutrients, vitamins and minerals have been observed in several ruminant species<sup>3,42,43</sup>. In the current  
412 study, the nutritional composition of colostrum changed over time and our results are in line with the  
413 literature. In ovines, variations from 0h-colostrum to milk are characterized by a slight decrease in fat  
414 content (ratio 0h-colostrum/milk  $\sim 1$ -1.5), an increase in lactose (ratio  $\sim 0.8$ ) and a very drastic decrease  
415 in protein content (ratio  $\sim 2$ -4)<sup>44</sup>.

416 Among the most abundant and studied proteins in colostrum are immunoglobulins (Igs). The ruminant's  
417 placental structure doesn't allow any transfer of Igs from dam vascular system to the fetus, thus  
418 depriving newborn ruminant of antibodies at birth<sup>45</sup>. Therefore, timely ingestion and absorption of  
419 colostrum Igs is critical for the survival of ruminant neonates. Our results showed a drastic decrease of  
420 colostrum IgG over time, an observation also seen by others<sup>44,46,47</sup>. The level of IgG in colostrum varies  
421 between breeds and ranges from 17.9 to 89.3 mg/ml depending on the ovine breed<sup>48,49</sup>, in line with the  
422 highest level of 79.5 mg/ml observed in the Romane ewes monitored in our study. The newborn immune  
423 system takes weeks to months to mature and become protective, and thus immune passive transfer  
424 through ingestion of IgG from colostrum is of paramount importance. Immunoglobulins improve  
425 animal growth, defenses against enteric infection by immunomodulation, mucin protein and/or  
426 modification of commensal microbial composition<sup>50</sup>. Although long term health parameters were not  
427 monitored in this study, the level of Ig in the serum of lambs at birth has been associated with a better  
428 survival during the neonatal period<sup>6</sup> and delaying colostrum feeding within 12h of life has been shown  
429 to decrease the passive transfer of IgG, possibly leaving the calf more vulnerable to infections during

430 the preweaning period<sup>51</sup>. The authors also observed a delay in bacterial gut colonization, increasing the  
431 risk for pathogen colonization of the neonate. In our study, the IgG level in lamb's serum drastically  
432 decreased with time, with a significant impact of the rearing mode. More precisely, lambs from the  
433 Cont-Art group presented 30 % less IgG in their serum after 2d than C lambs kept with their mothers,  
434 indicating a failure in the immune passive transfer. Lactoferrin is part of the high abundant protein pool  
435 mainly produced by the mammary epithelial cells, and possesses antibacterial, antifungal, antiviral and  
436 antiparasitic activities<sup>10,52</sup>. It is of particular significance against *Staphylococcus aureus*, the most  
437 common mastitis-related pathogen in sheep<sup>53</sup>. In young ruminants, lactoferrin significantly reduced  
438 mortality and culling rate when administered to preweaned calves<sup>54</sup> and decreased the number of days  
439 of disease, with less severe diarrhea cases in calves<sup>55</sup>. Lactoferrin concentration in ruminant colostrum  
440 greatly varies among species and breeds<sup>46,56,57</sup>. In ewes, Navarro et al.<sup>47</sup> measured the highest  
441 lactoferrin concentration of 0.72 mg/ml 24h after lambing, and afterwards, it decreased with time. Due  
442 to the sampling time, these values are lower than those observed in our study (average of  $3.59 \pm 0.2$   
443 mg/ml over the first 24h after lambing).

444 The metabolomics analysis performed in this study allowed us to describe, for the first time, ewe  
445 colostrum metabolites over the first 72h post-partum, with a focus on oligosaccharides (OS)  
446 composition. Our results indicated a decrease of OS concentration over time, in agreement with the  
447 literature<sup>58</sup>. Sialic acid – part of OS – include N-acylneuraminic acids and their derivatives, with N-  
448 acetylneuraminic acid (Neu5Ac) and N-glycolylneuraminic acid (Neu5Gc) being the most abundant. In  
449 ruminants, great variations of OS concentrations are observed<sup>59,60</sup>. In ovines, in agreement with our  
450 results, Neu5Gc is a dominant component among the colostrum sialic acids<sup>61</sup>, whereas in bovine  
451 colostrum, Neu5Ac compounds are predominant with great amounts of 3'-sialyllactose (3'SL)<sup>62</sup>.  
452 Neu5Gc is found in variable concentrations in other ruminant species' colostrum, depending on breed  
453<sup>63</sup>. Whereas Neu5Gc represents a great proportion of total sialic acids in bovine colostrum (~32 %),  
454 much lower levels (~6 %) are found at d90 of lactation in bovine milk<sup>64</sup>. Such variations have also been  
455 observed along the lactation period in goat colostrum and milk, ranging from 40.1 to 7.4 %<sup>65,66</sup>.

456  
457 To our knowledge, this study is the first to describe ovine colostrum bacterial composition up to the  
458 Family level. T0-colostrum samples were collected as aseptically as possible, but contaminations from  
459 the environment, animal or humans cannot be excluded. Despite inter-individual variability, total  
460 bacterial population was very stable over time at a concentration of  $\sim 10^6$  copies of 16S rDNA gene/g.  
461 These results are close to the concentrations obtained through classical bacterial enumerations reported  
462 by Lindner et al.,<sup>67</sup> and through qPCR quantification by Klein-Jöbstl et al.<sup>20</sup> on bovine colostrum  
463 (around  $5 \log_{10}$  CFU/ml and a median of  $4.55 \times 10^5$  copies/g, respectively). Bacterial composition of  
464 bovine colostrum and milk was described in several studies, confirming the presence of a resident  
465 microbiota in these biological fluids, however exact inoculation mechanisms remain unclear. In addition  
466 to teat skin as a potential source of inoculation, the hypothesis of an enteromammary route for colostrum

467 and milk microbiota has been suggested in several studies in humans and ruminants <sup>68</sup>. In ruminant,  
468 bacterial OTUs belonging to *Ruminococcus*, *Bifidobacterium* and *Peptostreptococcaceae* were  
469 observed in both milk and feces in lactating cows <sup>69</sup> and the enteromammary pathway of milk microbial  
470 inoculation has been suggested to occur through bacterial transport by immune cells <sup>70</sup>. In our study, we  
471 observed a dominance of Proteobacteria, Firmicutes and Actinobacteria in T0-colostrum samples. More  
472 precisely, at the Family level, high relative abundances of Aerococcaceae, Corynebacteriaceae,  
473 Moraxellaceae and Staphylococcaceae were observed. Members among Aerococcaceae and  
474 Moraxellaceae taxa are commonly associated with mastitis, while *S. aureus* is considered one of the  
475 main species responsible for clinical mastitis in dairy ruminant <sup>71,72</sup>, highlighting the presence of  
476 potential pathogens in ovine colostrum. Dominance of Proteobacteria in cow colostrum samples was  
477 observed in several studies <sup>19,20</sup>, while Lima et al. <sup>73</sup> observed a dominance of Firmicutes in colostrum  
478 from both primi- and multiparous cows. This heterogeneity in bacterial composition is also observed at  
479 genus level as *Lactobacillus*, *Staphylococcus*, *Bifidobacterium* and *Akkermansia* were reported <sup>19</sup> but  
480 typical members of rumen ecosystem were also observed such as *Prevotella* and *Ruminococcaceae* <sup>73</sup>.  
481 In one study, *Enhydrobacter* was found to be predominant in cow colostrum <sup>20</sup> while facultative  
482 anaerobic bacteria such as *Streptococcus*, *Acinetobacter*, *Enterobacter*, and *Corynebacterium* were  
483 observed in another work on the same animal species <sup>74</sup>. The presence of anaerobic and aerobic bacteria  
484 in colostrum may participate to early gut colonization <sup>75</sup>. The high heterogeneity of colostrum bacterial  
485 composition found in literature might be linked to the variability observed in the other parameters  
486 (nutrients, bioactive molecules, IgG), as it is generally reported for this type of biological fluid. No  
487 correlation could be drawn between colostrum microbiota and any of the studied parameters in the  
488 present work, due to the limited number of animals. Further studies are needed to bring more insights  
489 into potential mechanisms responsible for microbial inoculation of colostrum in the mammary gland.

490

#### 491 **The effect of live yeast supplementation in late gestation on colostrum and hypothesis on** 492 **mechanisms involved in colostrum quality improvement.**

493 To date, very few publications have addressed the interest of probiotics as a promising nutritional  
494 strategy in gestating ruminants to improve offspring health and performance through optimization of  
495 colostrum management. It has been shown that peripartum cows' supplementation with a 2-strains  
496 cocktail didn't improve colostrum and calves serum immunoglobulin concentrations, with only slight  
497 changes on colostrum nutrients yield <sup>76</sup>, highlighting the importance of several parameters such as the  
498 administrated strain, the dose or the animal species considered. In our study, SC supplementation to the  
499 gestating ewes was shown to increase bioactive molecules in colostrum, especially the Neu5Gc  
500 containing sialylated OS and the IgG concentrations. A significant increase of serum IgG concentration  
501 for lambs in artificial rearing system is likely to result in a beneficial long term effect on lamb immunity.  
502 No SC effect was seen on colostrum composition over time in our study, in accordance with Macedo et  
503 al., <sup>77</sup> who observed no effect of a culture of *S. cerevisiae* on ewes' colostrum nutritional composition

504 and yield. Contrarily, a cocktail of *Bacillus licheniformis* and *B. subtilis* (BioPlus 2B) supplementation  
505 increased daily milk yield, fat and protein contents and decreased lamb mortality (mainly due to  
506 diarrhea) from 13.1% to 7.8 %<sup>78</sup>. Stress hormones such as catecholamines are able to stimulate bacterial  
507 pathogens growth by enabling iron scavenging from normally inaccessible transferrin or lactoferrin<sup>79</sup>.  
508 An increase in lactoferrin content is thus of interest to prevent the growth of enteropathogenic bacteria  
509 in stressed ruminants. In our study, the numerical increase of lactoferrin content in colostrum due to SC  
510 supplementation could be of interest both for the protection of the mammary gland and the neonate  
511 health.

512 A higher level of colostral IgG was observed in the SC group, suggesting either a higher level of IgG  
513 in the serum of the dam or a promoted IgG transfer efficiency into the mammary gland of supplemented  
514 ewes. Once suckling is achieved, the neonate's serum immunoglobulins rise rapidly<sup>8</sup>. This process of  
515 passive immunoglobulin absorption in the intestine ceases at about 24h of age and is referred to as  
516 intestinal closure<sup>80</sup>. In our study, no effect of supplementation was seen in serum IgG of lambs kept  
517 with their mother. It can be hypothesized that as serum IgG of these lambs was already measured in  
518 high concentrations, the increase observed in colostral IgG in supplemented ewes was not sufficient to  
519 induce a biological and observable difference in offspring. On the contrary, when lambs had access to  
520 colostrum only for 12h before being separated from their dam and fed with milk replacer (Art groups),  
521 a significantly higher IgG concentration in the serum of lambs born from supplemented dams was  
522 observed. The risk for Failure of Passive Transfer (FTP) was also reduced in this group, as 3 lambs out  
523 of the 10 animals sampled at d2 in C group were considered as having a FTP (serum IgG concentration  
524 < 10 g/l), while it was observed for only 1 animal out of 10 in the SC group. Interestingly, the IgG level  
525 of this Art-Suppl group was similar to those observed in mothered lambs (Mot-groups) indicating a  
526 similar passive transfer of immunity. With SC supplementation to ewes, there would be thus a potential  
527 to counterbalance the negative impact of early mother separation and incomplete colostrum feeding in  
528 neonate lambs. In lambs, Igs production starts gradually several weeks after birth with detection of  
529 endogenous IgG2, IgM and IgG1 in their serum after 2, 3 and 7 weeks respectively<sup>81</sup>. The significant  
530 improvement in serum IgG status in artificially fed lambs born from supplemented dams actually  
531 represents a real benefit in terms of protection against diseases during the neonatal period until the  
532 young animal starts to produce its own antibodies. The indirect effects of probiotic supplementation to  
533 the mother on offspring immunity has previously been studied by Wójcik et al.<sup>82</sup>. The authors  
534 supplemented a brewer's yeast from the 4th month of ewe gestation or after lamb birth (15 or 30 g/h,  
535 respectively) and observed an increase in specific and non-specific humoral and cellular immunity in  
536 lambs (lysozyme, Igs, blood cells activity). The effects of direct probiotic supplementation on neonate  
537 immunity have been addressed in several studies with contradictory results. In neonate calves  
538 supplemented with *Lactobacillus acidophilus* and *L. plantarum* or *L. plantarum* only, a significantly  
539 slower decrease in serum IgG was observed compared to the control group<sup>83</sup>. The yeast probiotic  
540 *Saccharomyces boulardii* at 10<sup>6</sup> and 10<sup>7</sup> CFU/g in the supplemented feed enhanced blood IgG in lambs



541 following a vaccine against BoHV-5 virus and *Escherichia coli*, thus enhancing the humoral immune  
542 response <sup>84,85</sup>. On the contrary, supplementation of *L. plantarum* to dairy goats did not impact blood  
543 IgG, IgM, and IgA concentrations <sup>86</sup>.

544 OS are of great interest for neonate health as they can reach the intestine and promote beneficial  
545 bacterial growth. Indeed, high levels of OS were observed in the distal jejunum and colon respectively  
546 6 h and 12 h after colostrum ingestion by calves (~400 µg/g for 3'SL) <sup>15</sup>, which was linked to an increase  
547 in mucosa-associated *Bifidobacterium* in the distal jejunum and colon <sup>12,51</sup>. Overall, OS have been  
548 shown to inhibit adhesion of *Pseudomonas aeruginosa*, *Escherichia coli* O157:H7 and *Staphylococcus*  
549 *aureus* to epithelial cells <sup>87</sup> as well as ETEC strains binding to the intestinal epithelium <sup>16</sup>. More  
550 precisely, Neu5Gc is a receptor for several pathogens <sup>88-90</sup> and may appear as a first line of defense to  
551 limit pathogen internalization process. Thus, the increase of Neu5Gc compounds in the colostrum of  
552 supplemented ewes may increase newborn protection against various pathogens in the neonatal period,  
553 as well as promote growth of beneficial bacterial in the intestine. In our study, a significant increase in  
554 Neu5Gc concentrations was observed up to 5 h after birth in the colostrum of supplemented ewes, with  
555 6'-GSL and 6'-GSLN being highly enriched. The reconstruction of the biosynthesis pathway of Neu5Gc  
556 suggested a higher activity of sialyltransferase transforming CMP-Neu5Gc into Neu5Gc compounds,  
557 although it might not be the only alteration in the pathway. In a human study, a cocktail of probiotic  
558 bacteria modulated human milk oligosaccharide profile, increasing concentrations of 3'-sialyllactose  
559 and 3-fucosyllactose and decreasing concentration of 6'-sialyllactose <sup>91</sup>, but no study considering  
560 probiotic administration and colostrum OS composition in ruminants has been published yet.

561 Colostrum and milk microbiota have been shown to be affected by probiotic administration in humans.  
562 Indeed, administration of a multi-strain probiotic during the perinatal period resulted in increased  
563 lactobacilli and bifidobacteria in colostrum and milk of mothers with vaginal delivery compared to  
564 placebo <sup>92</sup>. Noteworthy, mothers with caesarian sections in the probiotic group didn't present similar  
565 bacterial increases. In addition, the same viable strain of obligate anaerobe *Bifidobacterium breve* was  
566 identified at the same time in human breast milk and both maternal and neonatal feces in one mother-  
567 child pair, demonstrating the existence of vertical mother-neonate transfer of maternal gut bacteria  
568 through breast feeding <sup>93</sup>. In our study, we couldn't identify significant differences in colostrum  
569 microbiota of the two groups, maybe due to high inter-individual variability and low number of samples.  
570 However, a higher numerical relative abundance of Corynebacteriaceae was observed in colostrum  
571 from the SC group. This taxon has been suggested to represent protection against mastitis pathogens  
572 through competition for niche adaptation by Porcellato et al., <sup>72</sup>.

573

574 Currently, the exact mechanisms by which oral probiotics would affect colostrum composition remains  
575 unclear. The reasons for the observed increase of lactoferrin and colostral IgG concentrations due to SC  
576 supplementation are not yet understood; nor are those explaining the modifications of OS pathways  
577 leading to higher levels of Neu5Gc compounds in ewes' colostrum. In a human study, Mastromarino et

578 al. suggested that orally distributed probiotic exerted a systemic effect through the improvement of  
579 various extra intestinal conditions, such as enhancement of immune activity and modulation of systemic  
580 inflammation and metabolic disturbances<sup>92</sup>. It can be hypothesized that probiotics, known to have  
581 beneficial effects on the GIT microbiota, would influence the bacterial transfer into the mammary gland  
582 and ultimately the microbial composition of colostrum and milk. According to this hypothesis, the  
583 ruminal microbial modifications expected with SC supplementation might impact lower gut microbiota,  
584 as suggested by studies of Bach et al.,<sup>26,27</sup> and thus might modulate this possible microbial transfer into  
585 the mammary gland. Live yeast supplementation leads to positive impacts on rumen microbiota and  
586 health but can also exert beneficial effects beyond the rumen on oxidative status and performance  
587<sup>26,31,94,95</sup>, strengthening the systemic effect hypothesis. Further investigations are required to understand  
588 how SC supplementation could induce modifications in colostrum bioactive molecules and bacterial  
589 populations.

590

591 Data Availability Statement: Sequencing data are available in the BioProject SRA database  
592 <https://submit.ncbi.nlm.nih.gov> as PRJNA732567.

593

594 Author contribution: Conceptualization, EF, FCD; methodology, LD, JR, EF, FCD; software, LD, JR,  
595 CA; formal analysis, LD, JR, FCD; investigation, LD, JR, MS, EF, FCD; data curation, LD; writing—  
596 original draft preparation, LD, FCD; writing—review and editing, JR, MS, MC, CA, EF; supervision,  
597 LD, FCD; project administration, EF, FCD; funding acquisition, EF, FCD. All authors have read and  
598 agreed to the published version of the manuscript.

599

600 Acknowledgments: the authors would like to thank Catherine Dhainaut and Raphaele Gresse from  
601 UMR MEDIS and Yu Jeaju from University of Guelph for their skilled technical assistance; Mickaël  
602 Bernard, Aline Cercy, Loic Gaillard, Bruno Viillard and Pierre Chirent from UE Herbipôle for their  
603 very valuable help in the animal experiment.

604

605 Financial support: This research was partially funded by Lallemand SAS.

606

607 Conflict of interest: LD, AC and FCD are employees of Lallemand SAS.

608

## 609 **References**

- 610 1. USDA. Dairy 2014: Health and management practices on U.S dairy operations, 2014. (2014).
- 611 2. Raboisson, D., Trillat, P. & Cahuzac, C. Failure of Passive Immune Transfer in Calves: A Meta-  
612 Analysis on the Consequences and Assessment of the Economic Impact. *PLoS One* **11**, (2016).

- 613 3. Hammon, H. M., Steinhoff-Wagner, J., Flor, J., Schönhusen, U. & Metges, C. C. LACTATION  
614 BIOLOGY SYMPOSIUM: Role of colostrum and colostrum components on glucose metabolism in  
615 neonatal calves<sup>1,2</sup>. *Journal of Animal Science* **91**, 685–695 (2013).
- 616 4. Hernandez-Castellano, L., Almeida, A., Castro, N. & Arguello, A. The Colostrum Proteome,  
617 Ruminant Nutrition and Immunity: A Review. *Current Protein & Peptide Science* **15**, 64–74 (2014).
- 618 5. National Animal Health Monitoring System. *Transfer of maternal immunity to calves.*  
619 *Highlights of the National Dairy Heifer Evaluation*. (1993).
- 620 6. Ahmad, R., Khan, A., Javed, M. T. & Hussain, I. The level of immunoglobulins in relation to  
621 neonatal lamb mortality in Pak-Karakul sheep. *Vet. arhiv* **11** (2000).
- 622 7. Hodgson, J. C., Moon, G. M., Hay, L. A. & Quirie, M. Effectiveness of substitute colostrum in  
623 preventing disease in newborn lambs. *BSAP Occasional Publication* **15**, 163–165 (1992).
- 624 8. Vihan, V. S. Immunoglobulin levels and their effect on neonatal survival in sheep and goats.  
625 *Small Ruminant Research* **1**, 135–144 (1988).
- 626 9. Lee, C. S. & Outteridge, P. M. Leucocytes of sheep colostrum, milk and involution secretion,  
627 with particular reference to ultrastructure and lymphocyte sub-populations. *J. Dairy Res.* **48**, 225–237  
628 (1981).
- 629 10. Katsafadou, A. I. *et al.* Mammary Defences and Immunity against Mastitis in Sheep. *Animals*  
630 (*Basel*) **9**, (2019).
- 631 11. Malmuthuge, N., Chen, Y., Liang, G., Goonewardene, L. A. & Guan, L. L. Heat-treated  
632 colostrum feeding promotes beneficial bacteria colonization in the small intestine of neonatal calves. *J.*  
633 *Dairy Sci.* **98**, 8044–8053 (2015).
- 634 12. Song, Y., Malmuthuge, N., Li, F. & Guan, L. L. Colostrum feeding shapes the hindgut  
635 microbiota of dairy calves during the first 12 h of life. *FEMS Microbiology Ecology* **95**, (2019).
- 636 13. Ward, R. E., Niñonuevo, M., Mills, D. A., Lebrilla, C. B. & German, J. B. In vitro fermentability  
637 of human milk oligosaccharides by several strains of bifidobacteria. *Mol Nutr Food Res* **51**, 1398–1405  
638 (2007).
- 639 14. Kavanaugh, D. W. *et al.* Exposure of *Bifidobacterium longum* subsp. *infantis* to Milk  
640 Oligosaccharides Increases Adhesion to Epithelial Cells and Induces a Substantial Transcriptional  
641 Response. *PLOS ONE* **8**, e67224 (2013).
- 642 15. Fischer, A. J., Malmuthuge, N., Guan, L. L. & Steele, M. A. Short communication: The effect  
643 of heat treatment of bovine colostrum on the concentration of oligosaccharides in colostrum and in the  
644 intestine of neonatal male Holstein calves. *Journal of Dairy Science* **101**, 401–407 (2018).
- 645 16. Martín, M.-J., Martín-Sosa, S. & Hueso, P. Binding of milk oligosaccharides by several  
646 enterotoxigenic *Escherichia coli* strains isolated from calves. *Glycoconj. J.* **19**, 5–11 (2002).
- 647 17. Blum, J. W. & Hammon, H. Colostrum effects on the gastrointestinal tract, and on nutritional,  
648 endocrine and metabolic parameters in neonatal calves. *Livestock Production Science* **66**, 151–159  
649 (2000).
- 650 18. Ontsouka, E. C., Albrecht, C. & Bruckmaier, R. M. Invited review: Growth-promoting effects  
651 of colostrum in calves based on interaction with intestinal cell surface receptors and receptor-like  
652 transporters. *J. Dairy Sci.* **99**, 4111–4123 (2016).

- 653 19. Yeoman, C. J. *et al.* Biogeographical Differences in the Influence of Maternal Microbial  
654 Sources on the Early Successional Development of the Bovine Neonatal Gastrointestinal tract. *Scientific*  
655 *Reports* **8**, 3197 (2018).
- 656 20. Klein-Jöbstl, D. *et al.* Microbiota of newborn calves and their mothers reveals possible transfer  
657 routes for newborn calves' gastrointestinal microbiota. *PLOS ONE* **14**, e0220554 (2019).
- 658 21. Napolitano, F., De Rosa, G. & Sevi, A. Welfare implications of artificial rearing and early  
659 weaning in sheep. *Applied Animal Behaviour Science* **110**, 58–72 (2008).
- 660 22. Mialon, M. M. *et al.* Short- and mid-term effects on performance, health and qualitative  
661 behavioural assessment of Romane lambs in different milk feeding conditions. *Animal* **15**, 100157  
662 (2021).
- 663 23. Chaucheyras-Durand, F. *et al.* Supplementation of live yeast based feed additive in early life  
664 promotes rumen microbial colonization and fibrolytic potential in lambs. *Sci Rep* **9**, 19216 (2019).
- 665 24. Amin, A. B. & Mao, S. Influence of yeast on rumen fermentation, growth performance and  
666 quality of products in ruminants: A review. *Animal Nutrition* **7**, 31–41 (2021).
- 667 25. Ogunade, I. M., Lay, J., Andries, K., McManus, C. J. & Bebe, F. Effects of live yeast on  
668 differential genetic and functional attributes of rumen microbiota in beef cattle. *Journal of Animal*  
669 *Science and Biotechnology* **10**, 68 (2019).
- 670 26. Bach, A. *et al.* Changes in the rumen and colon microbiota and effects of live yeast dietary  
671 supplementation during the transition from the dry period to lactation of dairy cows. *Journal of Dairy*  
672 *Science* **102**, 6180–6198 (2019).
- 673 27. Bach, A. *et al.* Changes in gene expression in the rumen and colon epithelia during the dry  
674 period through lactation of dairy cows and effects of live yeast supplementation. *J. Dairy Sci.* **101**,  
675 2631–2640 (2018).
- 676 28. Mann, S. *et al.* Effect of dry period dietary energy level in dairy cattle on volume,  
677 concentrations of immunoglobulin G, insulin, and fatty acid composition of colostrum. *J Dairy Sci* **99**,  
678 1515–1526 (2016).
- 679 29. Castro, N., Capote, J., Bruckmaier, R. M. & Argüello, A. Management effects on  
680 colostrogenesis in small ruminants: a review. *Journal of Applied Animal Research* **39**, 85–93 (2011).
- 681 30. Pecka-Kielb, E., Zachwieja, A., Wojtas, E. & Zawadzki, W. Influence of nutrition on the quality  
682 of colostrum and milk of ruminants. *Mljekarstvo : časopis za unaprjeđenje proizvodnje i prerade*  
683 *mlijeka* **68**, 169–181 (2018).
- 684 31. Dunière, L. *et al.* Changes in Digestive Microbiota, Rumen Fermentations and Oxidative Stress  
685 around Parturition Are Alleviated by Live Yeast Feed Supplementation to Gestating Ewes. *Journal of*  
686 *Fungi* **7**, 447 (2021).
- 687 32. Kessner, D., Chambers, M., Burke, R., Agus, D. & Mallick, P. ProteoWizard: open source  
688 software for rapid proteomics tools development. *Bioinformatics* **24**, 2534–2536 (2008).
- 689 33. Smith, C. A., Want, E. J., O'Maille, G., Abagyan, R. & Siuzdak, G. XCMS: processing mass  
690 spectrometry data for metabolite profiling using nonlinear peak alignment, matching, and identification.  
691 *Anal Chem* **78**, 779–787 (2006).
- 692 34. Tautenhahn, R., Böttcher, C. & Neumann, S. Highly sensitive feature detection for high  
693 resolution LC/MS. *BMC Bioinformatics* **9**, 504 (2008).

- 694 35. Prince, J. T. & Marcotte, E. M. Chromatographic alignment of ESI-LC-MS proteomics data  
695 sets by ordered bijective interpolated warping. *Anal Chem* **78**, 6140–6152 (2006).
- 696 36. Smith, C. A. *et al.* METLIN: a metabolite mass spectral database. *Ther Drug Monit* **27**, 747–  
697 751 (2005).
- 698 37. Bayat, A. R. *et al.* Effect of camelina oil or live yeasts (*Saccharomyces cerevisiae*) on ruminal  
699 methane production, rumen fermentation, and milk fatty acid composition in lactating cows fed grass  
700 silage diets. *Journal of Dairy Science* **98**, 3166–3181 (2015).
- 701 38. Mosoni, P., Chaucheyras-Durand, F., Béra-Maillet, C. & Forano, E. Quantification by real-time  
702 PCR of cellulolytic bacteria in the rumen of sheep after supplementation of a forage diet with readily  
703 fermentable carbohydrates: effect of a yeast additive. *J. Appl. Microbiol.* **103**, 2676–2685 (2007).
- 704 39. Escudié, F. *et al.* FROGS: Find, Rapidly, OTUs with Galaxy Solution. *Bioinformatics* **34**,  
705 1287–1294 (2018).
- 706 40. Mahé, F., Rognes, T., Quince, C., de Vargas, C. & Dunthorn, M. Swarm: robust and fast  
707 clustering method for amplicon-based studies. *PeerJ* **2**, e593 (2014).
- 708 41. Edgar, R. C., Haas, B. J., Clemente, J. C., Quince, C. & Knight, R. UCHIME improves  
709 sensitivity and speed of chimera detection. *Bioinformatics* **27**, 2194–2200 (2011).
- 710 42. Ahmadi, M. *et al.* Colostrum from Different Animal Species – A Product for Health Status  
711 Enhancement. *Bulletin of University of Agricultural Sciences and Veterinary Medicine Cluj-Napoca.*  
712 *Animal Science and Biotechnologies* **73**, (2016).
- 713 43. Csapó, J., Csapó-Kiss, Z., Martin, T. G., Szentpeteri, J. & Wolf, G. Composition of colostrum  
714 from goats, ewes and cows producing twins. *International Dairy Journal* **4**, 445–458 (1994).
- 715 44. Jacquet, A. & Rousset, A.-L. La production de colostrum chez la brebis : évaluation de la  
716 variabilité de la concentration et de la masse d’immunoglobulines G1(IgG1). (2013).
- 717 45. Barrington, G. M., McFadden, T. B., Huyler, M. T. & Besser, T. E. Regulation of  
718 colostrogenesis in cattle. *Livestock Production Science* **70**, 95–104 (2001).
- 719 46. Shapovalov, S. *et al.* Calf demand provision by mammary gland secretion during the first  
720 decade of post-natal development. *Heliyon* **5**, (2019).
- 721 47. Navarro, F. *et al.* Lactoferrin and IgG levels in ovine milk throughout lactation: Correlation  
722 with milk quality parameters. *Small ruminant research* (2018).
- 723 48. Kessler, E. C., Bruckmaier, R. M. & Gross, J. J. Immunoglobulin G content and colostrum  
724 composition of different goat and sheep breeds in Switzerland and Germany. *J. Dairy Sci.* **102**, 5542–  
725 5549 (2019).
- 726 49. Gautier, J.-M., Corbière, F. & Sagot, L. *La qualité du colostrum est-elle une garantie pour un*  
727 *bon transfert d’immunité à l’agneau ?*  
728 [http://idele.fr/no\\_cache/recherche/publication/idelesolr/recommends/la-qualite-du-colostrum-est-elle-](http://idele.fr/no_cache/recherche/publication/idelesolr/recommends/la-qualite-du-colostrum-est-elle-une-garantie-pour-un-bon-transfert-dimmunitite-a-lagneau.html)  
729 [une-garantie-pour-un-bon-transfert-dimmunitite-a-lagneau.html](http://idele.fr/no_cache/recherche/publication/idelesolr/recommends/la-qualite-du-colostrum-est-elle-une-garantie-pour-un-bon-transfert-dimmunitite-a-lagneau.html) (2013).
- 730 50. Balan, P., Sik-Han, K. & Moughan, P. J. Impact of oral immunoglobulins on animal health-A  
731 review. *Anim. Sci. J.* **90**, 1099–1110 (2019).
- 732 51. Fischer, A. J. *et al.* Effect of delaying colostrum feeding on passive transfer and intestinal  
733 bacterial colonization in neonatal male Holstein calves. *J. Dairy Sci.* **101**, 3099–3109 (2018).

- 734 52. García-Montoya, I. A., Cendón, T. S., Arévalo-Gallegos, S. & Rascón-Cruz, Q. Lactoferrin a  
735 multiple bioactive protein: an overview. *Biochim. Biophys. Acta* **1820**, 226–236 (2012).
- 736 53. Gelasakis, A. I., Mavrogianni, V. S., Petridis, I. G., Vasileiou, N. G. C. & Fthenakis, G. C.  
737 Mastitis in sheep--The last 10 years and the future of research. *Vet. Microbiol.* **181**, 136–146 (2015).
- 738 54. Habing, G. *et al.* Lactoferrin reduces mortality in preweaned calves with diarrhea. *Journal of*  
739 *Dairy Science* **100**, 3940–3948 (2017).
- 740 55. Prenner, M. L. *et al.* Effects of lactoferrin feeding on growth, feed intake and health of calves.  
741 *Arch Anim Nutr* **61**, 20–30 (2007).
- 742 56. McGrath, B. A., Fox, P. F., McSweeney, P. L. H. & Kelly, A. L. Composition and properties  
743 of bovine colostrum: a review. *Dairy Sci. & Technol.* **96**, 133–158 (2016).
- 744 57. Rachman, A. B., Maheswari, R. R. A. & Bachroem, M. S. Composition and Isolation of  
745 Lactoferrin from Colostrum and Milk of Various Goat Breeds. *Procedia Food Science* **3**, 200–210  
746 (2015).
- 747 58. Martín-Sosa, S., Martín, M.-J., García-Pardo, L.-A. & Hueso, P. Sialyloligosaccharides in  
748 Human and Bovine Milk and in Infant Formulas: Variations with the Progression of Lactation. *Journal*  
749 *of Dairy Science* **86**, 52–59 (2003).
- 750 59. Urashima, T., Taufik, E., Fukuda, K. & Asakuma, S. Recent advances in studies on milk  
751 oligosaccharides of cows and other domestic farm animals. *Biosci. Biotechnol. Biochem.* **77**, 455–466  
752 (2013).
- 753 60. Useh, N. M., Olaniyan, O. A. & Nok, A. J. Comparative analysis of sialic acid levels in the  
754 colostrum and milk of ruminants: possible role in the passive immunity against neonatal infections.  
755 *International Journal of Dairy Technology* **61**, 253–255 (2008).
- 756 61. Albrecht, S. *et al.* A comparative study of free oligosaccharides in the milk of domestic animals.  
757 *Br. J. Nutr.* **111**, 1313–1328 (2014).
- 758 62. Fischer-Tlustos, A. J. *et al.* Oligosaccharide concentrations in colostrum, transition milk, and  
759 mature milk of primi- and multiparous Holstein cows during the first week of lactation. *Journal of Dairy*  
760 *Science* (2020) doi:10.3168/jds.2019-17357.
- 761 63. McJarrow, P. & van Amelsfort-Schoonbeek, J. Bovine sialyl oligosaccharides: seasonal  
762 variations in their concentrations in milk, and a comparison of the colostrums of Jersey and Friesian  
763 cows. *International Dairy Journal* **14**, 571–579 (2004).
- 764 64. Puente, R. & Hueso, P. Lactational Changes in the N -Glycoloylneuraminic Acid Content of  
765 Bovine Milk Gangliosides. *Biological Chemistry Hoppe-Seyler* **374**, 475–478 (1993).
- 766 65. Martínez-Ferez, A. *et al.* Goats' milk as a natural source of lactose-derived oligosaccharides:  
767 Isolation by membrane technology. *International Dairy Journal* **16**, 173–181 (2006).
- 768 66. de Sousa, Y. R. F. *et al.* Sialic acid content of goat milk during lactation. *Livestock Science* **177**,  
769 175–180 (2015).
- 770 67. Lindner, J. D. D., Santarelli, M., Yamaguishi, C. T., Soccol, C. R. & Neviani, E. Recovery and  
771 identification of bovine colostrum microflora using traditional and molecular approaches. *Food*  
772 *Technology and Biotechnology* **49**, 364–368 (2011).
- 773 68. Oikonomou, G. *et al.* Milk Microbiota: What Are We Exactly Talking About? *Front Microbiol*  
774 **11**, 60 (2020).

- 775 69. Young, W., Hine, B. C., Wallace, O. A. M., Callaghan, M. & Bibiloni, R. Transfer of intestinal  
776 bacterial components to mammary secretions in the cow. *PeerJ* **3**, e888 (2015).
- 777 70. Addis, M. F. *et al.* The bovine milk microbiota: insights and perspectives from -omics studies.  
778 *Mol. BioSyst.* **12**, 2359–2372 (2016).
- 779 71. Angelopoulou, A., Warda, A. K., Hill, C. & Ross, R. P. Non-antibiotic microbial solutions for  
780 bovine mastitis – live biotherapeutics, bacteriophage, and phage lysins. *Critical Reviews in*  
781 *Microbiology* **45**, 564–580 (2019).
- 782 72. Porcellato, D., Meisal, R., Bombelli, A. & Narvhus, J. A. A core microbiota dominates a rich  
783 microbial diversity in the bovine udder and may indicate presence of dysbiosis. *Scientific Reports* **10**,  
784 21608 (2020).
- 785 73. Lima, S. F. *et al.* The bovine colostrum microbiome and its association with clinical mastitis.  
786 *J. Dairy Sci.* **100**, 3031–3042 (2017).
- 787 74. Hang, B. P. T., Wredle, E. & Dicksved, J. Analysis of the developing gut microbiota in young  
788 dairy calves-impact of colostrum microbiota and gut disturbances. *Trop Anim Health Prod* **53**, 50  
789 (2020).
- 790 75. Guo, J. *et al.* Distinct Stage Changes in Early-Life Colonization and Acquisition of the Gut  
791 Microbiota and Its Correlations With Volatile Fatty Acids in Goat Kids. *Front. Microbiol.* **11**, (2020).
- 792 76. Ort, S. B. *et al.* The impact of direct-fed microbials and enzymes on the health and performance  
793 of dairy cows with emphasis on colostrum quality and serum immunoglobulin concentrations in calves.  
794 *Journal of Animal Physiology and Animal Nutrition* **102**, e641 (2018).
- 795 77. Macedo, R. J. *et al.* Effect of supplemental yeast culture and physiological factors on colostrum  
796 and milk composition of Pelibuey ewes. *Tropical Animal Health and Production* **44**, 349–354 (2012).
- 797 78. Kritas, S. K., Govaris, A., Christodoulopoulos, G. & Burriel, A. R. Effect of *Bacillus*  
798 *licheniformis* and *Bacillus subtilis* Supplementation of Ewe's Feed on Sheep Milk Production and  
799 Young Lamb Mortality. *Journal of Veterinary Medicine Series A* **53**, 170–173 (2006).
- 800 79. Freestone, P. & Lyte, M. Stress and microbial endocrinology: prospects for ruminant nutrition.  
801 *animal* **4**, 1248–1257 (2010).
- 802 80. Nowak, R. & Poindron, P. From birth to colostrum: early steps leading to lamb survival.  
803 *Reproduction Nutrition Development* **46**, 431–446 (2006).
- 804 81. Klobasa, F. & Werhahn, E. [Variations in the concentrations of the immunoglobulins IgG1,  
805 IgG2, IgM and IgA in sheep. 2. Changes in the blood of lambs of different breeds and crossbreeds  
806 during the course of the rearing period]. *Berl Munch Tierarztl Wochenschr* **102**, 331–337 (1989).
- 807 82. Wójcik, R. *et al.* Defence mechanisms of the offspring of ewes fed a diet supplemented with  
808 yeast (*Saccharomyces cerevisiae*) during pregnancy and lactation. *Central European Journal of*  
809 *Immunology* **6** (2008).
- 810 83. Al-Saiady, M. Y. Effect of Probiotic Bacteria on Immunoglobulin G Concentration and Other  
811 Blood Components of Newborn Calves. *J. of Animal and Veterinary Advances* **9**, 604–609 (2010).
- 812 84. Roos, T. B. *et al.* Effect of *Bacillus cereus* var. *Toyo* and *Saccharomyces boulardii* on the  
813 immune response of sheep to vaccines. *Food and Agricultural Immunology* **21**, 113–118 (2010).
- 814 85. Roos, T. B. *et al.* Probiotics *Bacillus toyonensis* and *Saccharomyces boulardii* improve the  
815 vaccine immune response to Bovine herpesvirus type 5 in sheep. *Res. Vet. Sci.* **117**, 260–265 (2018).

- 816 86. Maragkoudakis, P. A. *et al.* Feed supplementation of *Lactobacillus plantarum* PCA 236  
817 modulates gut microbiota and milk fatty acid composition in dairy goats--a preliminary study. *Int. J.*  
818 *Food Microbiol.* **141 Suppl 1**, S109-116 (2010).
- 819 87. Lane, J. A., Calonne, J., Slattery, H. & Hickey, R. M. Oligosaccharides Isolated from MGO™  
820 Manuka Honey Inhibit the Adhesion of *Pseudomonas aeruginosa*, *Escherichia Coli* O157:H7 and  
821 *Staphylococcus Aureus* to Human HT-29 cells. *Foods* **8**, (2019).
- 822 88. Martin, M. J., Rayner, J. C., Gagneux, P., Barnwell, J. W. & Varki, A. Evolution of human-  
823 chimpanzee differences in malaria susceptibility: relationship to human genetic loss of N-  
824 glycolylneuraminic acid. *Proc. Natl. Acad. Sci. U.S.A.* **102**, 12819–12824 (2005).
- 825 89. Smit, H., Gaastra, W., Kamerling, J. P., Vliegthart, J. F. & Graaf, F. K. de. Isolation and  
826 structural characterization of the equine erythrocyte receptor for enterotoxigenic *Escherichia coli* K99  
827 fimbrial adhesin. *Infection and Immunity* **46**, 578–584 (1984).
- 828 90. Takahashi, T. *et al.* N-Glycolylneuraminic Acid on Human Epithelial Cells Prevents Entry of  
829 Influenza A Viruses That Possess N-Glycolylneuraminic Acid Binding Ability. *Journal of Virology* **88**,  
830 8445–8456 (2014).
- 831 91. Seppo, A. E. *et al.* Association of Maternal Probiotic Supplementation With Human Milk  
832 Oligosaccharide Composition. *JAMA Pediatr* **173**, 286–288 (2019).
- 833 92. Mastromarino, P. *et al.* Administration of a multistrain probiotic product (VSL#3) to women in  
834 the perinatal period differentially affects breast milk beneficial microbiota in relation to mode of  
835 delivery. *Pharmacol. Res.* **95–96**, 63–70 (2015).
- 836 93. Jost, T., Lacroix, C., Braegger, C. P., Rochat, F. & Chassard, C. Vertical mother–neonate  
837 transfer of maternal gut bacteria via breastfeeding. *Environmental Microbiology* **16**, 2891–2904 (2014).
- 838 94. Perdomo, M. C. *et al.* Effects of feeding live yeast at 2 dosages on performance and feeding  
839 behavior of dairy cows under heat stress. *Journal of Dairy Science* **103**, 325–339 (2020).
- 840 95. Mavrommatis, A. *et al.* Dietary Supplementation of a Live Yeast Product on Dairy Sheep Milk  
841 Performance, Oxidative and Immune Status in Peripartum Period. *Journal of Fungi* **6**, 334 (2020).
- 842
- 843



844 **Figures**

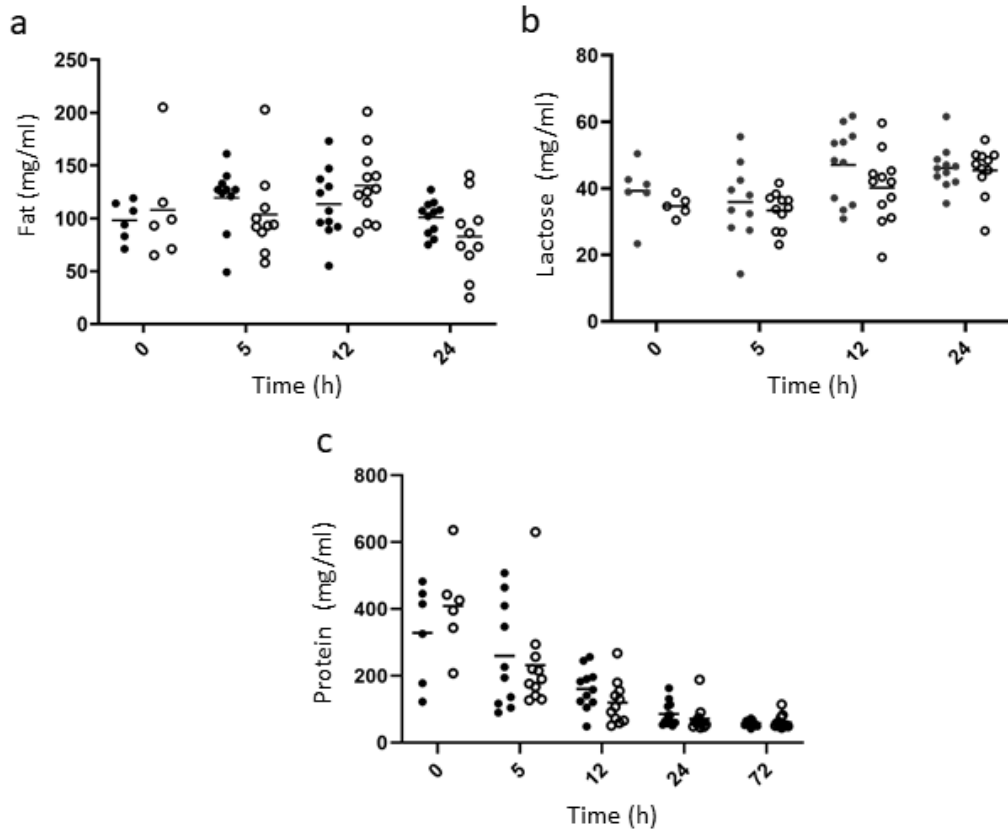

845

846 **Figure 1:** Evolution of fat (a), lactose (b) and protein (c) concentrations (mg/ml) over time in  
847 colostrum samples in C (dark circle) and SC (open circle) ewe groups.

848

849

850

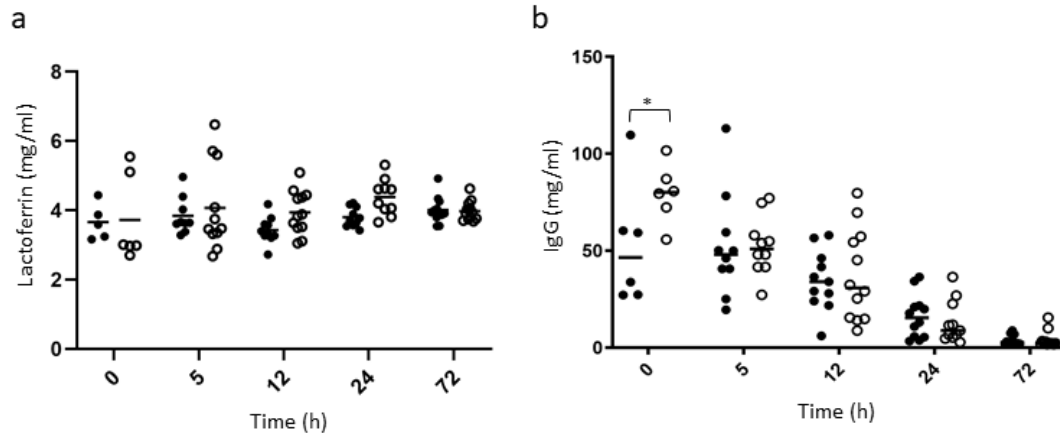

851

852 **Figure 2:** Lactoferrin (2a, mg/ml) and IgG (2b, mg/ml) concentrations over time in colostrum  
853 samples of C (dark circles) and SC (open circles) groups. Significant effects of Supplementation  
854 factor are indicated with a bracket with \*  $p < 0.05$ .

855

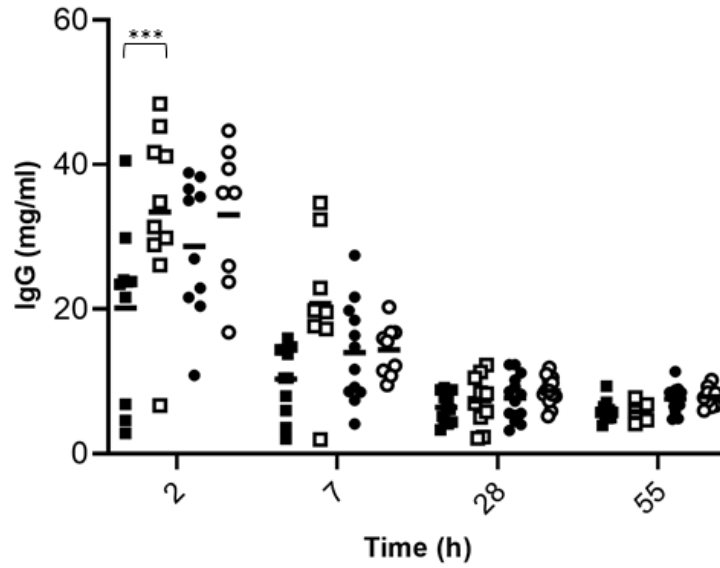

856

857 **Figure 3:** IgG concentration (mg/ml) over time in serum samples of lambs born from C (dark) or SC  
858 (white) ewes and raised with their mother (circle) or artificial fed (square). Significant effects of  
859 Supplementation factor are indicated in the graph with a bracket with \*\*\*  $p < 0.0001$ .

860

861

862

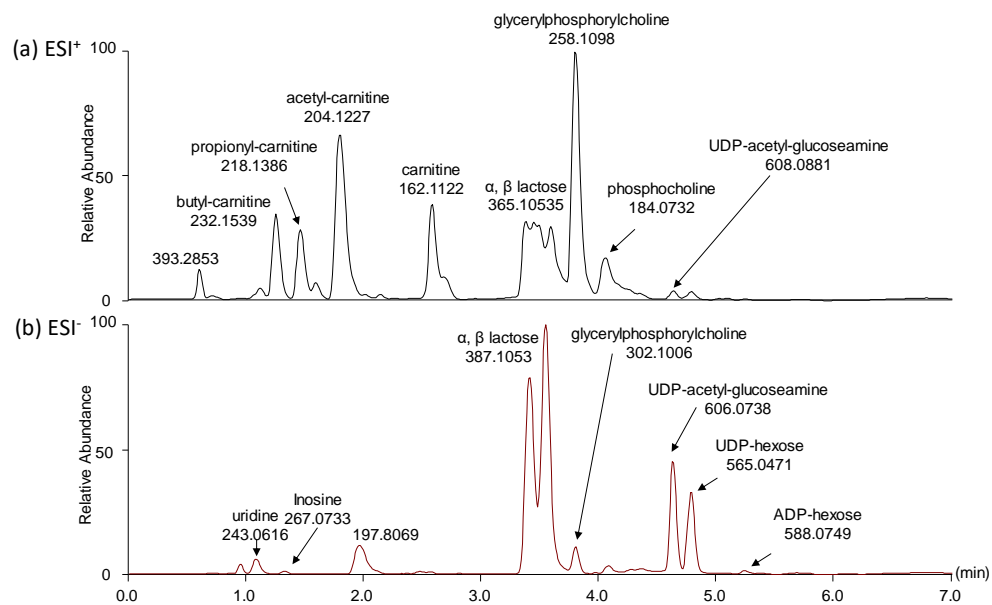

863

864 **Figure 4:** Colostrum samples analyzed in (a) positive and (b) negative ionization mode.

865

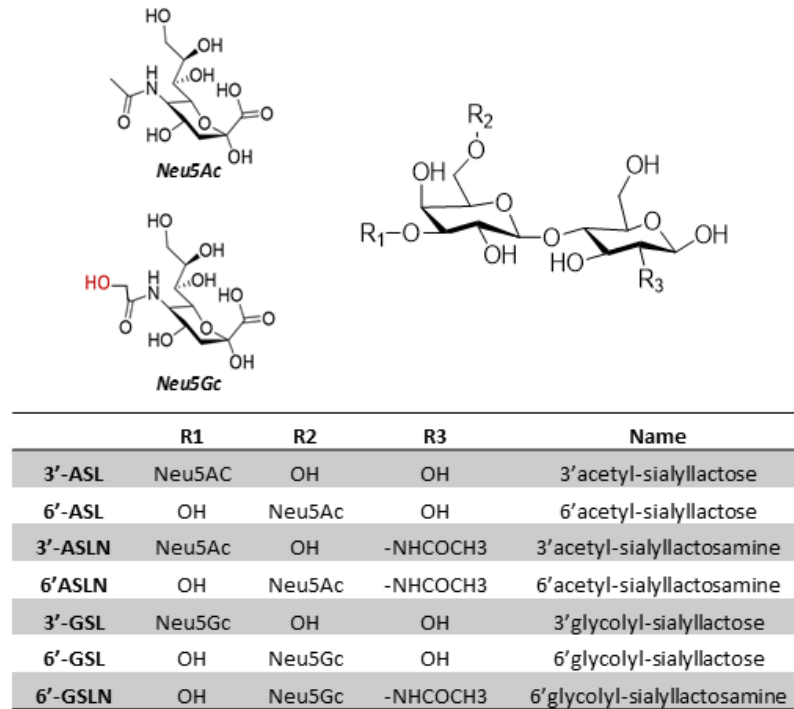

866

867

**Figure 5:** Spatial representations, name and nomenclature of the structures of major sialyl-oligosaccharides identified in ewe's colostrum.

868

869

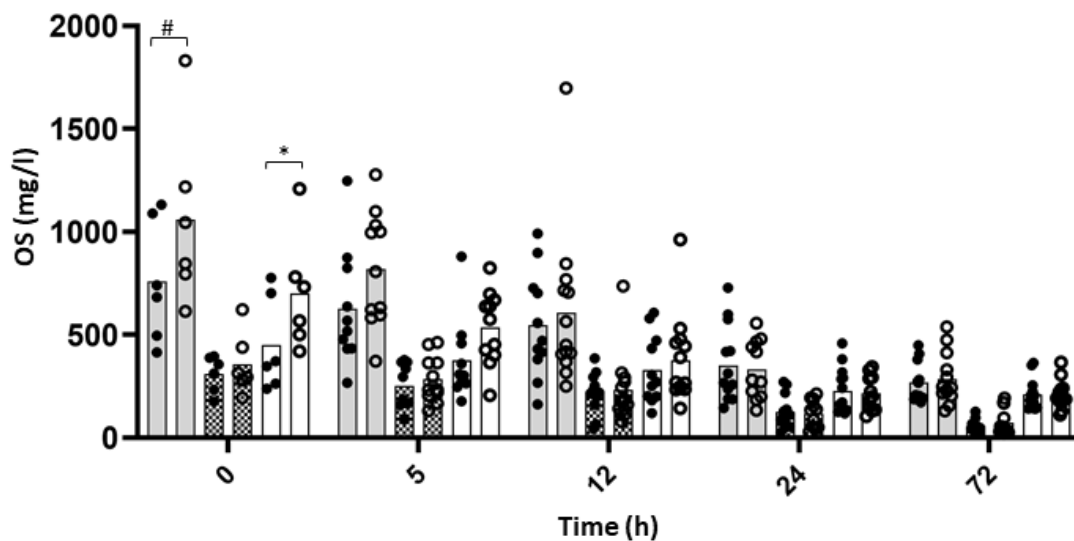

870

871

**Figure 6:** Concentrations of sialyl oligosaccharides in colostrum of C (dark circle) or SC (open circle) ewes over time. Grey, hatched and open bars represent the total sialylated OS, Neu5Ac and Neu5Gc OS content, respectively. Significant effects of Supplementation factor are indicated in the graph with a bracket with #  $p < 0.1$ , \*  $p < 0.05$ , \*\*  $p < 0.01$  and \*\*\*  $p < 0.0001$ .

872

873

874

875

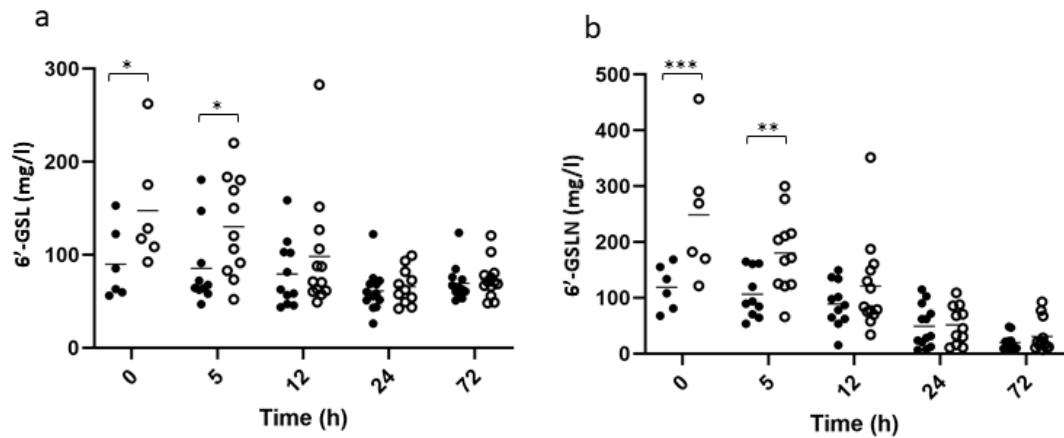

876

877 **Figure 7:** Concentrations of 6'GSL (a) and 6'-GSLN (b) OS in colostrum of C (dark circle) or SC  
 878 (open circle) ewes over time. Significant effects of Supplementation factor are indicated in the graph  
 879 with a bracket with #  $p < 0.1$ , \*  $p < 0.05$ , \*\*  $p < 0.01$  and \*\*\*  $p < 0.0001$ .

880

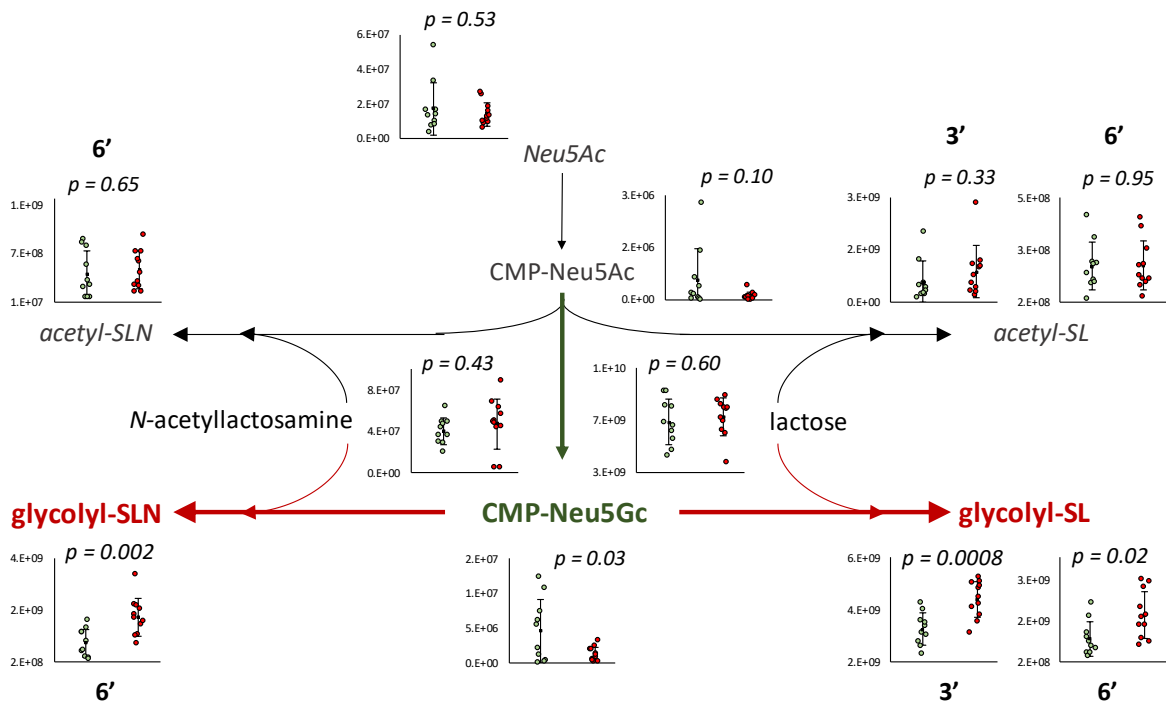

881

882 **Figure 8:** Biosynthetic pathway of sialyl-oligosaccharides with compounds observed in significantly  
 883 higher concentration in the colostrum of C (green) and SC (red) ewes at T5h. 3' and 6' indicates the  
 884 position of the sialyl group on the OS.

885

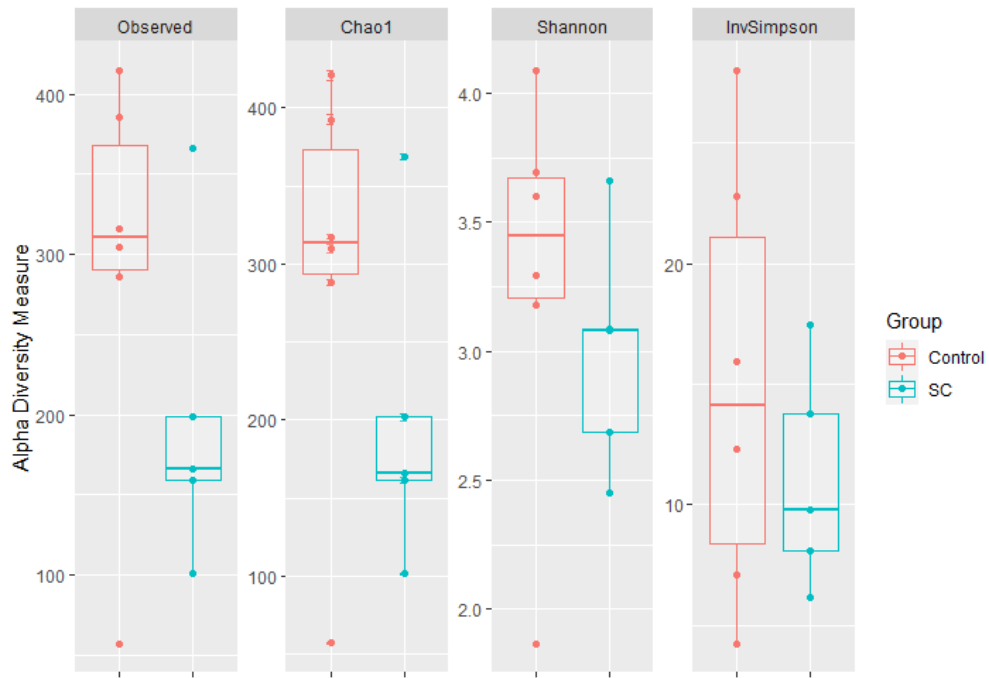

886

887 **Figure 9:** Alpha diversity indices of T0-colostrum samples from C (n = 6) and SC (n = 5) groups.

888

889 a)

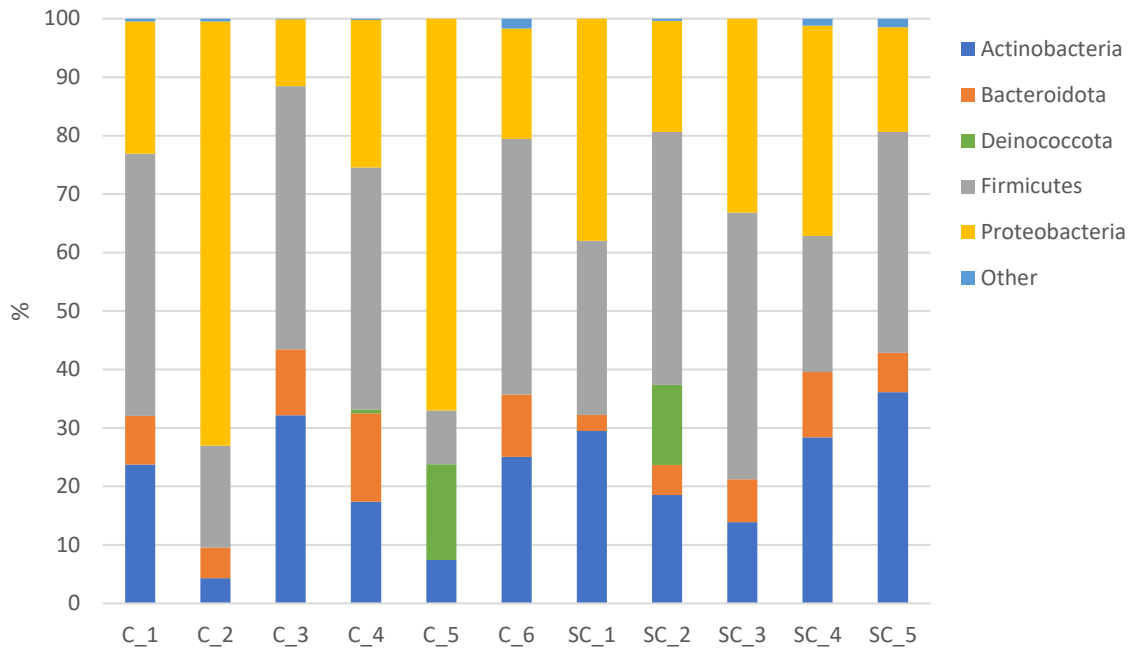

890

891 a)

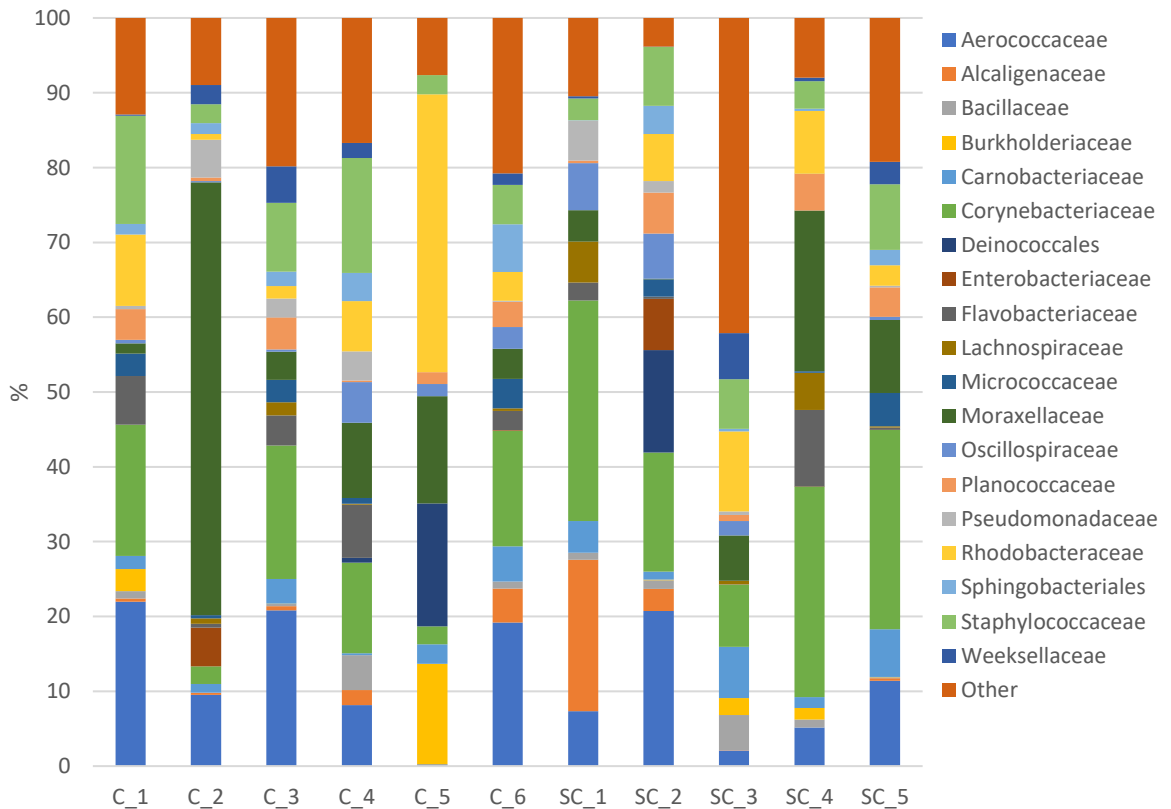

892

893 **Figure 10:** Bacterial composition of T0-colostrum samples from C or SC groups at the Phylum (a)

894 and Family (b) levels (only Families > 1% relative abundance were represented).

895

896 **Tables**

897 **Table 1:** p-values associated to statistical analysis of nutrient composition of colostrum samples with  
898 linear mixed model.

| <b>Nutrient (mg/ml)</b> | <b>Supplementation</b> | <b>Time</b>       | <b>S x T</b> |
|-------------------------|------------------------|-------------------|--------------|
| Fat                     | 0.82                   | <b>0.01</b>       | 0.15         |
| Lactose                 | 0.11                   | <b>&lt; 0.001</b> | 0.53         |
| Protein                 | 0.91                   | <b>&lt; 0.001</b> | 0.39         |

899

900 **Table 2:** p-values associated to statistical analysis of bioactive molecules' concentrations in  
901 colostrum samples with linear mixed model.

| <b>Bioactive molecules (mg/ml)</b> | <b>Supplementation</b> | <b>Time</b>       | <b>S x T</b> |
|------------------------------------|------------------------|-------------------|--------------|
| Lactoferrin                        | 0.14                   | 0.17              | 0.49         |
| IgG                                | 0.28                   | <b>&lt; 0.001</b> | <b>0.10</b>  |

902

903 **Table 3:** p-values associated to statistical analysis of IgG concentrations in the serum of lambs with  
904 linear mixed model.

| <b>IgG (mg/ml)</b> | <b>P-value</b>    |
|--------------------|-------------------|
| Time               | <b>&lt; 0.001</b> |
| Rearing mode       | 0.28              |
| Supplementation    | <b>0.01</b>       |
| T x R              | 0.19              |
| T x S              | <b>0.003</b>      |
| R x S              | 0.10              |
| T x R x S          | <b>0.09</b>       |

905

906



907 **Table 4:** p-values associated to statistical analysis of OS concentrations in colostrum samples with  
 908 linear mixed model.

|  | <b>OS (mg/l)</b> | <b>Time</b>    | <b>Supplementation</b> | <b>T x S</b> |
|--|------------------|----------------|------------------------|--------------|
|  | 3'ASL            | < <b>0.001</b> | 0.89                   | 0.87         |
|  | 6'ASL            | < <b>0.001</b> | 0.14                   | 0.64         |
|  | 3'ASLN           | < <b>0.001</b> | 0.31                   | 0.41         |
|  | 6'ASLN           | < <b>0.001</b> | 0.26                   | 0.63         |
|  | DSL              | <b>0.007</b>   | 0.79                   | 0.75         |
|  | Total Neu5Ac     | < <b>0.001</b> | 0.35                   | 0.77         |
|  | 3'GSL            | < <b>0.001</b> | 0.51                   | 0.30         |
|  | 6'GSL            | < <b>0.001</b> | <b>0.03</b>            | <b>0.07</b>  |
|  | 6'GSLN           | < <b>0.001</b> | <b>0.004</b>           | <b>0.001</b> |
|  | Total Neu5Gc     | < <b>0.001</b> | <b>0.06</b>            | <b>0.02</b>  |
|  | Total sialyl OS  | < <b>0.001</b> | 0.12                   | 0.13         |

909

910 **Table 5:** Mean and SD of total bacterial population (16S rDNA copies/g colostrum) in C or SC  
 911 colostrum samples over time and p-values associated through linear mixed model.

| <b>Group</b> |      | <b>Time (h)</b>        |                        |                        |                        |                        | <b>p-value</b> |                        |              |
|--------------|------|------------------------|------------------------|------------------------|------------------------|------------------------|----------------|------------------------|--------------|
|              |      | <b>0</b>               | <b>5</b>               | <b>12</b>              | <b>24</b>              | <b>72</b>              | <b>Time</b>    | <b>Supplementation</b> | <b>T x S</b> |
| C            | Mean | 7.38 x 10 <sup>5</sup> | 8.14 x 10 <sup>5</sup> | 9.68 x 10 <sup>5</sup> | 2.33 x 10 <sup>6</sup> | 7.86 x 10 <sup>5</sup> | 0.37           | 0.45                   | 0.89         |
|              | SD   | 8.21 x 10 <sup>5</sup> | 5.86 x 10 <sup>5</sup> | 1.52 x 10 <sup>6</sup> | 5.51 x 10 <sup>6</sup> | 12.3 x 10 <sup>5</sup> |                |                        |              |
| SC           | Mean | 4.35x10 <sup>5</sup>   | 1.01x10 <sup>6</sup>   | 2.57x10 <sup>6</sup>   | 2.42x10 <sup>6</sup>   | 1.29 x 10 <sup>6</sup> |                |                        |              |
|              | SD   | 2.49 x 10 <sup>5</sup> | 1.52 x 10 <sup>6</sup> | 5.12 x 10 <sup>6</sup> | 3.56 x 10 <sup>6</sup> | 2.43 x 10 <sup>6</sup> |                |                        |              |

912

913

914
